# Supplementary material for: Integration of Comprehensive Genomic Analysis and Functional Screening of Affected Molecular Pathways to Inform Cancer Therapy
Source: PubMed Central journal article supplement — Mayo Clin Proc. Author manuscript; Available in PMC 2020 May 27. (PMC7251931; doi:10.1016/j.mayocp.2019.07.019), 2019-11-02
Supplement: NIHMS1581966-supplement-2.pdf [file NIHMS1581966-supplement-2.pdf]

| Number of chrA | chrB | posA        | posB     | locusA   | locusB   | geneA   | geneB     | gene_prediction              |
|----------------|------|-------------|----------|----------|----------|---------|-----------|------------------------------|
| 22             | 4    | 4 38744692  | 38989349 | 4p14     | 4p14     | no_gene | TMEM156   | truncation TMEM156->noGene   |
| 21             | 4    | 4 56037426  | 57323354 | 4q12     | 4q12     | no_gene | no_gene   |                              |
| 32             | 4    | 4 36938184  | 1.25E+08 | 4p14     | 4q28.1   | no_gene | no_gene   |                              |
| 17             | 4    | 14 56037442 | 80041063 | 4q12     | 14q31.1  | no_gene | no_gene   |                              |
| 20             | 4    | 14 57325186 | 80041418 | 4q12     | 14q31.1  | no_gene | no_gene   |                              |
| 10             | 4    | 22 60383428 | 11354596 | 4q13.1   | 22p11.2  | no_gene | no_gene   |                              |
| 6              | 8    | 8 37197544  | 39607653 | 8p11.23  | 8p11.22  | no_gene | ADAM18    | truncation ADAM18->noGene    |
| 5              | 12   | 12 41169760 | 51704946 | 12q12    | 12q13.13 | no_gene | SCN8A     | truncation SCN8A->noGene     |
| 19             | 12   | 12 41169516 | 51966034 | 12q12    | 12q13.13 | no_gene | ACVR1B    | truncation noGene->ACVR1B    |
| 16             | 12   | 12 51704895 | 51967871 | 12q13.13 | 12q13.13 | SCN8A   | ACVR1B    |                              |
| 21             | 12   | 12 51702660 | 53363201 | 12q13.13 | 12q13.13 | SCN8A   | no_gene   | truncation noGene->SCN8A     |
| 8              | 12   | 12 51967870 | 53363224 | 12q13.13 | 12q13.13 | ACVR1B  | no_gene   | truncation ACVR1B->noGene    |
| 21             | 12   | 17 59160796 | 20355382 | 12q14.1  | 17p11.2  | no_gene | CCDC144CP | truncation CCDC144CP->noGene |
| 17             | 16   | 16 11584139 | 11834047 | 16p13.13 | 16p13.13 | LITAF   | no_gene   | truncation LITAF->noGene     |
| 29             | 18   | 18 411257   | 8442067  | 18p11.32 | 18p11.23 | COLEC12 | no_gene   | truncation COLEC12->noGene   |
| 30             | 18   | 18 12455794 | 12505934 | 18p11.21 | 18p11.21 | SPIRE1  | SPIRE1    |                              |
| 26             | 23   | 23 62778535 | 64290442 | Xq11.1   | Xq11.2   | no_gene | MTMR8     | truncation MTMR8->noGene     |
