# Supplementary material for: Integration of Comprehensive Genomic Analysis and Functional Screening of Affected Molecular Pathways to Inform Cancer Therapy
Source: PubMed Central journal article supplement — Mayo Clin Proc. Author manuscript; Available in PMC 2020 May 27. (PMC7251931; doi:10.1016/j.mayocp.2019.07.019), 2019-11-02
Supplement: NIHMS1581966-supplement-4.pdf [file NIHMS1581966-supplement-4.pdf]

| Chr   | Pos | Ref      | Alt | Qual | dbSNP   | Type      | Gene                  | Mutation   |
|-------|-----|----------|-----|------|---------|-----------|-----------------------|------------|
| 756   | 1   | 9018318  | C   | T    | 1822.19 | .         | Substitutor SLC2A7    | c.494G>A_  |
| 760   | 1   | 9040089  | C   | G    | 792.19  | .         | Substitutor SLC2A5    | c.672G>C_  |
| 910   | 1   | 11027518 | G   | C    | 1379.19 | .         | Substitutor MASP2     | c.1428C>G  |
| 1809  | 1   | 17283051 | C   | G    | 1788.19 | .         | Substitutor PADI3     | c.1967C>G  |
| 2393  | 1   | 24089566 | C   | G    | 522.19  | .         | Substitutor MYOM3     | c.1586G>C  |
| 2920  | 1   | 32226498 | G   | A    | 410.19  | .         | Substitutor EIF3I     | c.496G>A_  |
| 3074  | 1   | 35451769 | C   | T    | 753.19  | .         | Substitutor KIAA0319L | c.1921G>A  |
| 3305  | 1   | 39684155 | G   | C    | 1018.19 | .         | Substitutor HPCAL4    | c.163-3C>( |
| 3378  | 1   | 40463038 | C   | G    | 2886.19 | .         | Substitutor ZFP69B    | c.1054C>G  |
| 3571  | 1   | 43578894 | C   | T    | 719.19  | .         | Substitutor PTPRF     | c.653C>T_  |
| 3668  | 1   | 44757552 | C   | G    | 1025.19 | .         | Substitutor KIF2C     | c.816-4C>( |
| 3742  | 1   | 45614322 | C   | T    | 911.19  | .         | Substitutor NASP      | c.1622C>T  |
| 3744  | 1   | 45615469 | C   | G    | 1427.19 | .         | Substitutor NASP      | c.1828C>G  |
| 4097  | 1   | 53461648 | G   | A    | 1533.19 | .         | Substitutor DMRTB1    | c.750+3G>  |
| 4339  | 1   | 61406561 | G   | C    | 12.55   | .         | Substitutor NFIA      | c.199-1G>( |
| 5110  | 1   | 88983707 | T   | C    | 57.2    | rs1126362 | Substitutor RBMXL1    | c.120A>G_  |
| 6633  | 1   | 1.5E+08  | C   | T    | 247.19  | .         | Substitutor PRPF3     | c.277-7C>^ |
| 6926  | 1   | 1.52E+08 | C   | T    | 368.23  | rs7687917 | Substitutor HRNR      | c.5144G>A  |
| 6927  | 1   | 1.52E+08 | C   | T    | 163.28  | rs8001828 | Substitutor HRNR      | c.5107G>A  |
| 7278  | 1   | 1.55E+08 | G   | C    | 1293.19 | .         | Substitutor PBXIP1    | c.1133C>G  |
| 7781  | 1   | 1.6E+08  | C   | T    | 462.19  | .         | Substitutor C1orf204  | c.332+1G>  |
| 8370  | 1   | 1.68E+08 | C   | A    | 1577.19 | .         | Substitutor GPR161    | c.1321G>T  |
| 8434  | 1   | 1.69E+08 | G   | A    | 226.19  | .         | Substitutor CCDC181   | c.1243C>T  |
| 8442  | 1   | 1.7E+08  | C   | T    | 868.19  | .         | Substitutor F5        | c.6528+4G  |
| 8755  | 1   | 1.78E+08 | G   | A    | 159.19  | .         | Substitutor SEC16B    | c.2267C>T  |
| 8796  | 1   | 1.79E+08 | G   | A    | 505.19  | .         | Substitutor RALGPS2   | c.73G>A_p  |
| 8797  | 1   | 1.79E+08 | G   | C    | 590.19  | .         | Substitutor RALGPS2   | c.102G>C_  |
| 8798  | 1   | 1.79E+08 | G   | A    | 871.19  | .         | Substitutor RALGPS2   | c.151G>A_  |
| 8935  | 1   | 1.8E+08  | C   | G    | 896.19  | .         | Substitutor CEP350    | c.5278C>G  |
| 9125  | 1   | 1.83E+08 | C   | T    | 673.19  | .         | Substitutor LAMC1     | c.3728C>T  |
| 9581  | 1   | 2.01E+08 | C   | G    | 461.19  | .         | Substitutor LAD1      | c.1570G>C  |
| 9582  | 1   | 2.01E+08 | C   | G    | 474.19  | rs1408085 | Substitutor LAD1      | c.1398G>C  |
| 10455 | 1   | 2.11E+08 | G   | T    | 542.19  | .         | Substitutor RCOR3     | c.136G>T_  |
| 10597 | 1   | 2.13E+08 | C   | T    | 674.19  | .         | Substitutor RPS6KC1   | c.388C>T_  |
| 10812 | 1   | 2.21E+08 | C   | T    | 4168.19 | .         | Substitutor HLX       | c.1324C>T  |
| 10940 | 1   | 2.24E+08 | G   | A    | 698.19  | .         | Substitutor DEGS1     | c.415G>A_  |
| 10994 | 1   | 2.25E+08 | G   | C    | 974.19  | .         | Substitutor DNAH14    | c.5247G>C  |
| 11084 | 1   | 2.26E+08 | C   | T    | 734.19  | .         | Substitutor PARP1     | c.853G>A_  |
| 11110 | 1   | 2.27E+08 | C   | G    | 2071.19 | .         | Substitutor ADCK3     | c.1452C>G  |
| 11430 | 1   | 2.31E+08 | C   | G    | 666.19  | .         | Substitutor TRIM67    | c.1772C>G  |
| 11456 | 1   | 2.31E+08 | G   | A    | 1669.19 | .         | Substitutor EXOC8     | c.43C>T_p  |
| 11587 | 1   | 2.35E+08 | G   | T    | 444.19  | .         | Substitutor TBCE      | c.1114G>T  |
| 11616 | 1   | 2.36E+08 | C   | T    | 3036.19 | .         | Substitutor LYST      | c.1373G>A  |
| 11875 | 1   | 2.4E+08  | G   | A    | 54.19   | .         | Substitutor FMN2      | c.3970G>A  |
| 11953 | 1   | 2.43E+08 | C   | T    | 1077.19 | .         | Substitutor CEP170    | c.3208G>A  |
| 12064 | 1   | 2.47E+08 | C   | G    | 875.19  | .         | Substitutor AHCTF1    | c.6397G>C  |
| 12344 | 1   | 2.49E+08 | A   | G    | 121.19  | rs2005549 | Substitutor OR2T29    | c.215T>C_  |
| 12830 | 2   | 10046183 | G   | A    | 1243.19 | .         | Substitutor KLF11     | c.25G>A_p  |
| 12831 | 2   | 10046228 | G   | A    | 1043.19 | .         | Substitutor KLF11     | c.70G>A_p  |
| 12832 | 2   | 10047939 | G   | A    | 1680.19 | .         | Substitutor KLF11     | c.551G>A_  |
| 13060 | 2   | 19946549 | G   | C    | 1676.19 | .         | Substitutor WDR35     | c.1579C>G  |
| 13507 | 2   | 27523348 | C   | T    | 906.19  | .         | Substitutor GCKR      | c.1787C>T  |
| 13705 | 2   | 32063834 | G   | A    | 389.19  | .         | Substitutor SPAST     | c.3G>A_p.l |
| 14299 | 2   | 47570232 | C   | T    | 1212.19 | .         | Substitutor KCNK12    | c.100G>A_  |

|       |   |          |    |   |         |                        |          |            |
|-------|---|----------|----|---|---------|------------------------|----------|------------|
| 14443 | 2 | 55222251 | C  | T | 1767.19 | Substitutor            | CLHC1    | c.161G>A_  |
| 14701 | 2 | 64989686 | C  | T | 1174.19 | Substitutor            | SLC1A4   | c.43C>T_p  |
| 14817 | 2 | 68464869 | C  | T | 1050.19 | Substitutor            | FBXO48   | c.277G>A_  |
| 14818 | 2 | 68464947 | C  | G | 1457.19 | Substitutor            | FBXO48   | c.199G>C_  |
| 15533 | 2 | 95149730 | C  | G | 1120.19 | Substitutor            | ZNF514   | c.755G>C_  |
| 15651 | 2 | 96808699 | C  | T | 1444.19 | Substitutor            | CNNM4    | c.2087C>T  |
| 15969 | 2 | 1.02E+08 | G  | A | 1126.19 | rs5661653; Substitutor | IL1R2    | c.586G>A_  |
| 16333 | 2 | 1.13E+08 | C  | T | 623.19  | Substitutor            | SLC20A1  | c.800C>T_  |
| 16619 | 2 | 1.2E+08  | CT | C | 122.69  | Deletion               | PTPN4    | c.1981-3de |
| 16828 | 2 | 1.28E+08 | G  | C | 57.19   | rs6173201; Substitutor | HS6ST1   | c.187C>G_  |
| 17154 | 2 | 1.35E+08 | C  | T | 1164.19 | Substitutor            | RAB3GAP  | c.352C>T_  |
| 17422 | 2 | 1.52E+08 | G  | T | 692.19  | Substitutor            | CACNB4   | c.959C>A_  |
| 17527 | 2 | 1.58E+08 | C  | T | 447.19  | Substitutor            | UPP2     | c.695C>T_  |
| 17579 | 2 | 1.59E+08 | TA | T | 24.16   | Deletion               | WDSUB1   | c.1274-3de |
| 17753 | 2 | 1.66E+08 | C  | T | 918.19  | Substitutor            | SCN9A    | c.3325G>A  |
| 17754 | 2 | 1.66E+08 | C  | G | 706.19  | Substitutor            | SCN9A    | c.2944G>C  |
| 18055 | 2 | 1.72E+08 | G  | A | 596.19  | Substitutor            | ITGA6    | c.724G>A_  |
| 18220 | 2 | 1.76E+08 | G  | A | 665.19  | Substitutor            | HOXD9    | c.706G>A_  |
| 18382 | 2 | 1.79E+08 | C  | T | 1207.19 | Substitutor            | TTN      | c.53086G>  |
| 18388 | 2 | 1.79E+08 | C  | T | 1100.19 | Substitutor            | TTN      | c.24739G>  |
| 18566 | 2 | 1.86E+08 | G  | C | 1600.19 | Substitutor            | FSIP2    | c.11833G>  |
| 18723 | 2 | 1.91E+08 | G  | T | 164.19  | Substitutor            | TMEM194f | c.33C>A_p  |
| 18728 | 2 | 1.91E+08 | C  | T | 544.19  | Substitutor            | NAB1     | c.1247C>T  |
| 18840 | 2 | 1.96E+08 | C  | T | 644.19  | Substitutor            | HECW2    | c.250G>A_  |
| 18911 | 2 | 1.99E+08 | G  | C | 920.19  | Substitutor            | SATB2    | c.1942C>G  |
| 19104 | 2 | 2.03E+08 | G  | C | 432.19  | Substitutor            | NBEAL1   | c.3265G>C  |
| 19221 | 2 | 2.06E+08 | C  | G | 2015.19 | Substitutor            | ZDBF2    | c.5251C>G  |
| 19814 | 2 | 2.2E+08  | C  | T | 1597.19 | Substitutor            | CHPF     | c.661G>A_  |
| 19917 | 2 | 2.23E+08 | A  | C | 1335.19 | Substitutor            | ACSL3    | c.1107A>C  |
| 19995 | 2 | 2.27E+08 | G  | A | 1538.19 | Substitutor            | IRS1     | c.1154C>T  |
| 20039 | 2 | 2.27E+08 | G  | C | 610.19  | Substitutor            | COL4A3   | c.2866G>C  |
| 20309 | 2 | 2.33E+08 | G  | C | 2820.19 | Substitutor            | NEU2     | c.1126G>C  |
| 20328 | 2 | 2.33E+08 | G  | A | 1489.19 | Substitutor            | SAG      | c.75+3G>A  |
| 21409 | 3 | 10104536 | C  | T | 1486.19 | Substitutor            | FANCD2O  | c.239G>A_  |
| 21563 | 3 | 13571205 | G  | A | 926.19  | Substitutor            | FBLN2    | c.850G>A_  |
| 21748 | 3 | 16598119 | C  | G | 186.19  | Substitutor            | DAZL     | c.210G>C_  |
| 22196 | 3 | 38598981 | C  | T | 750.19  | rs1994731; Substitutor | SCN5A    | c.1960G>A  |
| 22502 | 3 | 44629488 | G  | C | 637.19  | Substitutor            | ZNF197   | c.334G>C_  |
| 22884 | 3 | 48918497 | C  | A | 1656.19 | Substitutor            | ARIH2OS  | c.653G>T_  |
| 23429 | 3 | 56648839 | G  | C | 200.19  | Substitutor            | FAM208A  | c.1496C>G  |
| 23507 | 3 | 58408950 | G  | C | 1399.19 | Substitutor            | PXK      | c.1257G>C  |
| 23574 | 3 | 62281569 | G  | A | 351.19  | Substitutor            | PTPRG    | c.3685G>A  |
| 23652 | 3 | 64647944 | C  | T | 469.19  | Substitutor            | ADAMTS9  | c.1622G>A  |
| 25190 | 3 | 1.2E+08  | G  | T | 523.19  | Substitutor            | NR112    | c.519+5G>  |
| 25436 | 3 | 1.24E+08 | C  | T | 902.19  | Substitutor            | MYLK     | c.121G>A_  |
| 25813 | 3 | 1.29E+08 | G  | C | 868.19  | Substitutor            | KIAA1257 | c.809-3C>( |
| 25814 | 3 | 1.29E+08 | G  | C | 423.19  | Substitutor            | EFCC1    | c.4G>C_p.  |
| 25816 | 3 | 1.29E+08 | G  | C | 817.19  | Substitutor            | EFCC1    | c.25G>C_p  |
| 26296 | 3 | 1.41E+08 | G  | C | 1504.19 | Substitutor            | PXYLP1   | c.1216G>C  |
| 26305 | 3 | 1.42E+08 | C  | T | 1967.19 | Substitutor            | RASA2    | c.1034C>T  |
| 26404 | 3 | 1.49E+08 | G  | A | 327.19  | Substitutor            | HPS3     | c.211G>A_  |
| 26859 | 3 | 1.68E+08 | G  | C | 404.19  | Substitutor            | WDR49    | c.1413C>G  |
| 27464 | 3 | 1.87E+08 | G  | T | 1324.19 | Substitutor            | MASP1    | c.1787C>A  |
| 27654 | 3 | 1.93E+08 | G  | A | 531.19  | rs3731850; Substitutor | MB21D2   | c.451C>T_  |
| 28822 | 4 | 3316685  | C  | G | 1926.19 | Substitutor            | RGS12    | c.515C>G_  |

|       |   |          |    |    |         |                     |             |                     |
|-------|---|----------|----|----|---------|---------------------|-------------|---------------------|
| 31987 | 4 | 1.09E+08 | TA | T  | 20.19   | rs3395872: Deletion | ETNPPL      | c.928-5del          |
| 32174 | 4 | 1.18E+08 | G  | A  | 1413.19 | .                   | Substitutor | NDST3 c.133G>A_     |
| 32474 | 4 | 1.29E+08 | C  | T  | 1648.19 | .                   | Substitutor | JADE1 c.110C>T_     |
| 32881 | 4 | 1.51E+08 | C  | G  | 180.19  | .                   | Substitutor | SH3D19 c.694+3G>    |
| 33181 | 4 | 1.63E+08 | C  | G  | 1797.19 | .                   | Substitutor | NPY5R c.913C>G_     |
| 33600 | 4 | 1.83E+08 | G  | A  | 1604.19 | .                   | Substitutor | CDKN2AIF c.272+7G>  |
| 34775 | 5 | 32087680 | C  | T  | 931.19  | .                   | Substitutor | PDZD2 c.4232C>T     |
| 34994 | 5 | 37226404 | G  | A  | 854.19  | .                   | Substitutor | C5orf42 c.2191C>T   |
| 35102 | 5 | 41012588 | C  | T  | 741.19  | .                   | Substitutor | MROH2B c.3130G>A    |
| 35465 | 5 | 56923959 | C  | G  | 750.19  | .                   | Substitutor | MIER3 c.1005G>C     |
| 36922 | 5 | 1.16E+08 | C  | T  | 1886.19 | .                   | Substitutor | TMED7-TI c.527G>A_  |
| 37632 | 5 | 1.39E+08 | C  | T  | 622.19  | rs3757318!          | Substitutor | ECSCR c.157+3G>     |
| 37885 | 5 | 1.41E+08 | A  | G  | 18.25   | .                   | Substitutor | PCDHB11 c.479A>G_   |
| 37886 | 5 | 1.41E+08 | C  | A  | 18.25   | .                   | Substitutor | PCDHB11 c.482C>A_   |
| 38667 | 5 | 1.57E+08 | C  | T  | 602.19  | rs1381397!          | Substitutor | HAVCR2 c.890G>A_    |
| 39109 | 5 | 1.74E+08 | C  | T  | 1169.19 | .                   | Substitutor | BOD1 c.142G>A_      |
| 39155 | 5 | 1.75E+08 | G  | T  | 1411.19 | .                   | Substitutor | DRD1 c.167C>A_      |
| 39252 | 5 | 1.77E+08 | G  | A  | 1651.19 | .                   | Substitutor | RNF44 c.944C>T_     |
| 39794 | 5 | 1.81E+08 | C  | T  | 1491.19 | .                   | Substitutor | FLT4 c.214G>A_      |
| 39982 | 6 | 2623466  | C  | G  | 800.19  | .                   | Substitutor | C6orf195 c.357G>C_  |
| 40464 | 6 | 11005562 | G  | T  | 790.19  | .                   | Substitutor | ELOVL2 c.68-3C>A    |
| 40526 | 6 | 12120295 | C  | T  | 2680.19 | .                   | Substitutor | HIVEP1 c.500C>T_    |
| 40726 | 6 | 20126524 | G  | A  | 2054.19 | rs1422552!          | Substitutor | MBOAT1 c.707C>T_    |
| 40916 | 6 | 25495160 | C  | A  | 1657.19 | .                   | Substitutor | LRRC16A c.1270C>A   |
| 41067 | 6 | 27132411 | C  | T  | 1411.19 | .                   | Substitutor | HIST1H2B c.340G>A_  |
| 41174 | 6 | 28435508 | C  | T  | 784.19  | .                   | Substitutor | ZSCAN23 c.508G>A_   |
| 41712 | 6 | 30137328 | G  | A  | 290.19  | .                   | Substitutor | TRIM40 c.292G>A_    |
| 42025 | 6 | 31144729 | C  | A  | 866.19  | .                   | Substitutor | CCHCR1 c.2125G>T    |
| 42201 | 6 | 31271082 | G  | C  | 21.22   | rs4155561!          | Substitutor | HLA-C c.610C>G_     |
| 42202 | 6 | 31271089 | C  | G  | 30.19   | rs1741367!          | Substitutor | HLA-C c.603G>C_     |
| 42540 | 6 | 31529914 | G  | C  | 553.19  | .                   | Substitutor | MCCD1 c.339G>C_     |
| 42593 | 6 | 31625595 | G  | A  | 1218.19 | .                   | Substitutor | PRRC2A c.743G>A_    |
| 42722 | 6 | 31880184 | G  | T  | 699.19  | .                   | Substitutor | EHMT2 c.3533C>A     |
| 42749 | 6 | 31970204 | C  | G  | 1869.19 | .                   | Substitutor | DXO c.949-1G>!      |
| 42998 | 6 | 32517756 | C  | CA | 46.15   | .                   | Insertion   | HLA-DRB5 c.788-5dup |
| 42999 | 6 | 32517758 | G  | A  | 55.19   | .                   | Substitutor | HLA-DRB5 c.788-6C>~ |
| 43243 | 6 | 32580273 | G  | A  | 54.23   | rs2873225!          | Substitutor | HLA-DRB1 c.764-3C>~ |
| 43244 | 6 | 32580276 | A  | G  | 54.23   | rs2873225!          | Substitutor | HLA-DRB1 c.764-6T>C |
| 44015 | 6 | 32745200 | C  | T  | 56.19   | rs2007452!          | Substitutor | HLA-DQA2 c.124C>T_  |
| 44259 | 6 | 33205046 | G  | A  | 1431.19 | .                   | Substitutor | HSD17B8 c.197G>A_   |
| 44915 | 6 | 43013339 | C  | G  | 680.19  | .                   | Substitutor | MEA1 c.79G>C_!      |
| 44927 | 6 | 43173853 | G  | C  | 1630.19 | .                   | Substitutor | SRF c.520G>C_       |
| 45285 | 6 | 53009574 | G  | C  | 346.19  | .                   | Substitutor | ICK c.1493-7C>      |
| 45596 | 6 | 73428785 | G  | A  | 306.19  | .                   | Substitutor | MB21D1 c.1141C>T    |
| 46394 | 6 | 1.08E+08 | G  | A  | 1037.19 | .                   | Substitutor | SEC63 c.394C>T_     |
| 46475 | 6 | 1.09E+08 | C  | T  | 1439.19 | rs1118923!          | Substitutor | SMPD2 c.492-7C>~    |
| 47302 | 6 | 1.38E+08 | C  | T  | 1482.19 | .                   | Substitutor | NHSL1 c.2386G>A     |
| 47347 | 6 | 1.42E+08 | C  | G  | 415.19  | .                   | Substitutor | NMBR c.711G>C_      |
| 47723 | 6 | 1.52E+08 | C  | A  | 502.19  | .                   | Substitutor | SYNE1 c.22233G>     |
| 47766 | 6 | 1.53E+08 | C  | T  | 651.19  | .                   | Substitutor | VIP c.108-3C>~      |
| 47802 | 6 | 1.54E+08 | C  | G  | 213.19  | .                   | Substitutor | CNKS3 c.834G>C_     |
| 48509 | 6 | 1.7E+08  | G  | C  | 1551.19 | .                   | Substitutor | C6orf120 c.496G>C_  |
| 49553 | 7 | 22194009 | G  | A  | 1522.19 | .                   | Substitutor | RAPGEF5 c.1021C>T   |
| 49763 | 7 | 27792066 | C  | T  | 849.19  | .                   | Substitutor | TAX1BP1 c.1099C>T   |
| 50984 | 7 | 56021092 | C  | T  | 573.19  | .                   | Substitutor | PSPH c.121G>A_      |

|       |    |          |    |   |         |            |             |          |            |
|-------|----|----------|----|---|---------|------------|-------------|----------|------------|
| 51665 | 7  | 76281518 | G  | C | 123.19  | .          | Substitutor | SRRM3    | c.1086G>C  |
| 51838 | 7  | 82915772 | C  | T | 653.19  | .          | Substitutor | PCLO     | c.2374G>A  |
| 51900 | 7  | 87545910 | C  | T | 1298.19 | .          | Substitutor | ABCB1    | c.1840G>A  |
| 52138 | 7  | 94411033 | GT | G | 88.15   | rs3558740: | Deletion    | COL1A2   | c.1252-7de |
| 52741 | 7  | 1.01E+08 | C  | T | 57.87   | .          | Substitutor | MUC3A    | c.3584C>T  |
| 52744 | 7  | 1.01E+08 | C  | T | 28.45   | .          | Substitutor | MUC3A    | c.3599C>T  |
| 53745 | 7  | 1.18E+08 | C  | A | 53.19   | rs4727853  | Substitutor | CFTR     | c.1251C>A  |
| 54041 | 7  | 1.29E+08 | C  | T | 2131.19 | .          | Substitutor | TNPO3    | c.43G>A_c  |
| 54426 | 7  | 1.39E+08 | G  | A | 376.19  | .          | Substitutor | KIAA1549 | c.98C>T_p  |
| 54982 | 7  | 1.43E+08 | G  | A | 918.19  | .          | Substitutor | PIP      | c.95+3G>A  |
| 55453 | 7  | 1.52E+08 | G  | C | 1358.19 | .          | Substitutor | KMT2C    | c.14461-3C |
| 55822 | 8  | 245496   | C  | G | 1226.19 | .          | Substitutor | ZNF596   | c.649C>G_  |
| 56689 | 8  | 17544492 | G  | T | 1302.19 | .          | Substitutor | SLC7A2   | c.538G>T_  |
| 56848 | 8  | 20211224 | C  | G | 1471.19 | .          | Substitutor | ATP6V1B2 | c.511C>G_  |
| 57255 | 8  | 27422313 | G  | A | 1318.19 | .          | Substitutor | PTK2B    | c.481G>A_  |
| 58056 | 8  | 58496828 | G  | C | 892.19  | .          | Substitutor | CYP7A1   | c.684C>G_  |
| 58389 | 8  | 76704305 | C  | G | 1464.19 | .          | Substitutor | ZFHX4    | c.217C>G_  |
| 58544 | 8  | 86556270 | C  | T | 1139.19 | .          | Substitutor | CPNE3    | c.1423C>T  |
| 59115 | 8  | 1.08E+08 | G  | A | 430.19  | .          | Substitutor | EIF3E    | c.188C>T_  |
| 59126 | 8  | 1.09E+08 | G  | C | 1973.19 | .          | Substitutor | PKHD1L1  | c.8310G>C  |
| 59127 | 8  | 1.09E+08 | G  | A | 2096.19 | rs2676017: | Substitutor | PKHD1L1  | c.8377G>A  |
| 59128 | 8  | 1.1E+08  | C  | T | 449.19  | .          | Substitutor | PKHD1L1  | c.12223C>  |
| 60253 | 8  | 1.44E+08 | G  | A | 1391.19 | rs5689420: | Substitutor | TONSL    | c.2623C>T  |
| 60308 | 8  | 1.45E+08 | C  | G | 1525.19 | .          | Substitutor | RECQL4   | c.2467G>C  |
| 60591 | 9  | 5922523  | C  | G | 530.19  | .          | Substitutor | KIAA2026 | c.3383G>C  |
| 60717 | 9  | 13175787 | C  | G | 577.19  | .          | Substitutor | MPDZ     | c.3020G>C  |
| 60844 | 9  | 17464481 | CT | C | 12.4    | .          | Deletion    | CNTLN    | c.3405-5de |
| 61166 | 9  | 33313717 | G  | C | 782.19  | .          | Substitutor | NFX1     | c.1512G>C  |
| 61293 | 9  | 34512111 | C  | T | 494.19  | .          | Substitutor | DNAI1    | c.1314C>T  |
| 61382 | 9  | 35385757 | C  | T | 628.19  | .          | Substitutor | UNC13B   | c.1423C>T  |
| 61431 | 9  | 35801067 | C  | T | 583.19  | .          | Substitutor | NPR2     | c.1352-3C> |
| 61706 | 9  | 41938378 | C  | A | 109.23  | .          | Substitutor | CNTNAP3  | c.1821G>T  |
| 62216 | 9  | 76502496 | G  | A | 865.19  | .          | Substitutor | GCNT1    | c.115G>A_  |
| 62271 | 9  | 77339509 | A  | T | 27.29   | .          | Substitutor | VPS13A   | c.6379-7A> |
| 62543 | 9  | 89045816 | C  | G | 1106.19 | .          | Substitutor | SHC3     | c.1131G>C  |
| 62648 | 9  | 92416628 | C  | T | 475.19  | .          | Substitutor | OMD      | c.931G>A_  |
| 62764 | 9  | 95111478 | C  | G | 958.19  | .          | Substitutor | FANCC    | c.1314G>C  |
| 62852 | 9  | 97693658 | G  | A | 150.19  | .          | Substitutor | XPA      | c.274C>T_  |
| 62936 | 9  | 99968415 | AT | A | 30.21   | rs3686506: | Deletion    | STX17    | c.670-5del |
| 63121 | 9  | 1.06E+08 | C  | G | 602.19  | .          | Substitutor | FKTN     | c.352C>G_  |
| 63277 | 9  | 1.1E+08  | C  | G | 1530.19 | .          | Substitutor | SVEP1    | c.6091G>C  |
| 63463 | 9  | 1.13E+08 | G  | C | 347.19  | .          | Substitutor | PRPF4    | c.634G>C_  |
| 63998 | 9  | 1.25E+08 | C  | T | 849.19  | .          | Substitutor | MAPKAP1  | c.685G>A_  |
| 64966 | 9  | 1.36E+08 | G  | A | 1685.19 | rs1995734: | Substitutor | LCN1     | c.386G>A_  |
| 66201 | 10 | 15782222 | G  | C | 283.19  | .          | Substitutor | FAM188A  | c.1121C>G  |
| 66353 | 10 | 20176998 | G  | C | 617.19  | .          | Substitutor | PLXDC2   | c.737-1G>I |
| 67040 | 10 | 43386956 | G  | A | 990.19  | .          | Substitutor | HNRNPF   | c.929C>T_  |
| 67237 | 10 | 47351181 | G  | C | 1304.19 | .          | Substitutor | RBP3     | c.2697G>C  |
| 67377 | 10 | 49708509 | G  | C | 1325.19 | .          | Substitutor | C10orf53 | c.366G>C_  |
| 68114 | 10 | 73765528 | C  | A | 798.19  | .          | Substitutor | SEC24C   | c.1305C>A  |
| 68422 | 10 | 84213351 | G  | C | 746.19  | .          | Substitutor | CDHR1    | c.2040+3G  |
| 68658 | 10 | 89443777 | C  | G | 952.19  | .          | Substitutor | SLC16A12 | c.283G>C_  |
| 69036 | 10 | 97650995 | C  | G | 393.19  | .          | Substitutor | PI4K2A   | c.490C>G_  |
| 69480 | 10 | 1.05E+08 | C  | T | 282.19  | .          | Substitutor | SORCS3   | c.3533C>T  |
| 69765 | 10 | 1.17E+08 | G  | C | 977.19  | .          | Substitutor | ENO4     | c.1222G>C  |

|       |    |          |      |   |         |            |             |          |            |
|-------|----|----------|------|---|---------|------------|-------------|----------|------------|
| 69784 | 10 | 1.17E+08 | G    | C | 2915.19 | .          | Substitutor | KCNK18   | c.955G>C_  |
| 70133 | 10 | 1.25E+08 | G    | C | 1499.19 | .          | Substitutor | ZRANB1   | c.195G>C_  |
| 70556 | 10 | 1.33E+08 | G    | A | 334.19  | .          | Substitutor | UTF1     | c.583G>A_  |
| 70786 | 11 | 373831   | G    | T | 1422.19 | .          | Substitutor | B4GALNT4 | c.783+3G>  |
| 70787 | 11 | 375532   | G    | A | 1166.19 | .          | Substitutor | B4GALNT4 | c.850+5G>  |
| 70789 | 11 | 376297   | G    | C | 1347.19 | .          | Substitutor | B4GALNT4 | c.1243G>C  |
| 72118 | 11 | 6239403  | G    | C | 1625.19 | .          | Substitutor | CNGA4    | c.82G>C_   |
| 72566 | 11 | 9420501  | G    | A | 272.19  | .          | Substitutor | IPO7     | c.817G>A_  |
| 72574 | 11 | 9577203  | C    | T | 663.19  | .          | Substitutor | WEE1     | c.1081C>T  |
| 73077 | 11 | 20103722 | C    | A | 1664.19 | .          | Substitutor | NAV2     | c.6651C>A  |
| 73612 | 11 | 36592989 | C    | G | 1156.19 | .          | Substitutor | RAG2     | c.1180G>C  |
| 73613 | 11 | 36593112 | C    | T | 1292.19 | .          | Substitutor | RAG2     | c.1057G>A  |
| 73636 | 11 | 43444125 | G    | C | 1820.19 | .          | Substitutor | TTC17    | c.2752G>C  |
| 73823 | 11 | 46875902 | C    | G | 1489.19 | .          | Substitutor | LRP4     | c.3601G>C  |
| 73862 | 11 | 47245789 | C    | T | 1168.19 | .          | Substitutor | ACP2     | c.343G>A_  |
| 73869 | 11 | 47267981 | G    | A | 790.19  | .          | Substitutor | NR1H3    | c.1057G>A  |
| 74402 | 11 | 56743060 | T    | C | 1482.19 | .          | Substitutor | OR9G4    | c.752A>G_  |
| 74872 | 11 | 61962736 | G    | C | 2778.19 | .          | Substitutor | BEST1    | c.1582G>C  |
| 75123 | 11 | 64315797 | G    | A | 168.19  | rs2013363: | Substitutor | ESRRA    | c.1100G>A  |
| 75125 | 11 | 64315818 | G    | A | 123.19  | rs1508483: | Substitutor | ESRRA    | c.1121G>A  |
| 75126 | 11 | 64315821 | G    | T | 87.19   | rs2019713: | Substitutor | ESRRA    | c.1124G>T  |
| 75127 | 11 | 64315823 | CGGG | C | 75.15   | .          | Deletion    | ESRRA    | c.1127_11: |
| 75130 | 11 | 64315848 | T    | C | 69.19   | rs2010729: | Substitutor | ESRRA    | c.1151T>C  |
| 75131 | 11 | 64315856 | C    | T | 75.19   | rs7920458: | Substitutor | ESRRA    | c.1159C>T  |
| 75804 | 11 | 70326604 | C    | T | 842.19  | .          | Substitutor | PPFIA1   | c.716C>T_  |
| 77181 | 11 | 1.07E+08 | C    | G | 1002.19 | .          | Substitutor | CWF19L2  | c.1936G>C  |
| 77187 | 11 | 1.07E+08 | G    | T | 786.19  | .          | Substitutor | CWF19L2  | c.707C>A_  |
| 77255 | 11 | 1.08E+08 | G    | C | 129.19  | .          | Substitutor | ATM      | c.5415G>C  |
| 77748 | 11 | 1.19E+08 | C    | T | 688.19  | .          | Substitutor | PHLDB1   | c.1739C>T  |
| 78574 | 11 | 1.3E+08  | G    | C | 490.19  | .          | Substitutor | NFRKB    | c.196C>G_  |
| 81299 | 12 | 42313917 | C    | T | 511.19  | .          | Substitutor | ZCRB1    | c.280G>A_  |
| 81614 | 12 | 49043139 | C    | T | 361.19  | .          | Substitutor | KMT2D    | c.5581G>A  |
| 81632 | 12 | 49186409 | A    | G | 158.19  | rs5877844: | Substitutor | TUBA1A   | c.428T>C_  |
| 81633 | 12 | 49186412 | T    | C | 161.19  | .          | Substitutor | TUBA1A   | c.425A>G_  |
| 81889 | 12 | 51702800 | G    | A | 1007.19 | .          | Substitutor | SCN8A    | c.1020G>A  |
| 81971 | 12 | 52315327 | C    | G | 1018.19 | .          | Substitutor | KRT83    | c.1279G>C  |
| 82416 | 12 | 55574714 | C    | G | 1386.19 | .          | Substitutor | OR2AP1   | c.300C>G_  |
| 82589 | 12 | 57187259 | C    | G | 590.19  | .          | Substitutor | LRP1     | c.6842-8C> |
| 82655 | 12 | 57571324 | G    | A | 528.19  | .          | Substitutor | KIF5A    | c.1030G>A  |
| 83744 | 12 | 95670124 | C    | G | 734.19  | .          | Substitutor | NTN4     | c.1422G>C  |
| 83936 | 12 | 1.03E+08 | C    | T | 1248.19 | .          | Substitutor | PAH      | c.334G>A_  |
| 84407 | 12 | 1.1E+08  | G    | C | 1246.19 | .          | Substitutor | IFT81    | c.166G>C_  |
| 84981 | 12 | 1.22E+08 | G    | A | 545.19  | .          | Substitutor | PSMD9    | c.472G>A_  |
| 86928 | 13 | 35159904 | G    | A | 999.19  | .          | Substitutor | NBEA     | c.3733G>A  |
| 87299 | 13 | 45015531 | G    | A | 1427.19 | .          | Substitutor | GPALPP1  | c.130G>A_  |
| 87410 | 13 | 48473359 | G    | A | 173.19  | rs5877788: | Substitutor | RB1      | c.2490-1G> |
| 87639 | 13 | 59983875 | G    | C | 167.19  | .          | Substitutor | DIAPH3   | c.585C>G_  |
| 87870 | 13 | 77761053 | C    | T | 534.19  | rs5447492: | Substitutor | SLAIN1   | c.443C>T_  |
| 87878 | 13 | 78615900 | C    | T | 1377.19 | .          | Substitutor | RNF219   | c.1861G>A  |
| 87908 | 13 | 79405744 | C    | T | 1799.19 | .          | Substitutor | RBM26    | c.31G>A_   |
| 88197 | 13 | 1.03E+08 | C    | T | 1071.19 | .          | Substitutor | CCDC168  | c.6745G>A  |
| 89640 | 14 | 31069839 | C    | G | 626.19  | .          | Substitutor | AP4S1    | c.139-4C>  |
| 89854 | 14 | 37591910 | C    | T | 1241.19 | .          | Substitutor | FOXA1    | c.874G>A_  |
| 90091 | 14 | 50771439 | G    | C | 1182.19 | .          | Substitutor | NIN      | c.1011C>G  |
| 91833 | 14 | 91458830 | C    | T | 869.19  | .          | Substitutor | SMEK1    | c.1714G>A  |

|        |    |          |       |    |         |            |                      |                |
|--------|----|----------|-------|----|---------|------------|----------------------|----------------|
| 92555  | 14 | 1.03E+08 | C     | G  | 907.19  | .          | Substitutor CDC42BP1 | c.1491G>C      |
| 92556  | 14 | 1.03E+08 | C     | G  | 3535.19 | .          | Substitutor CDC42BP1 | c.1351G>C      |
| 93987  | 15 | 33788385 | G     | T  | 2817.19 | .          | Substitutor RYR3     | c.9757G>T      |
| 97135  | 15 | 89116426 | G     | C  | 1110.19 | .          | Substitutor ABHD2    | c.99G>C_f      |
| 98781  | 16 | 2764585  | G     | C  | 1074.19 | .          | Substitutor SRRM2    | c.4057G>C      |
| 99112  | 16 | 4727113  | T     | C  | 505.19  | rs37055161 | Substitutor ANKS3    | c.235A>G_      |
| 99685  | 16 | 15068234 | C     | A  | 287.19  | .          | Substitutor RRN3     | c.1389G>T      |
| 100215 | 16 | 27463582 | C     | G  | 2042.19 | .          | Substitutor GTF3C1   | c.5808G>C      |
| 100246 | 16 | 28496179 | G     | A  | 651.19  | .          | Substitutor APOBR    | c.1138G>A      |
| 100345 | 16 | 29804841 | G     | A  | 220.19  | rs36929714 | Substitutor KIF22    | c.1543G>A      |
| 100891 | 16 | 53826005 | G     | C  | 1199.19 | .          | Substitutor FTO      | c.265G>C_      |
| 101560 | 16 | 68738336 | CCT   | C  | 2916.15 | .          | Deletion CDH1        | c.89_90del     |
| 102750 | 16 | 87403029 | G     | A  | 1890.19 | rs37192574 | Substitutor MAP1LC3F | c.310G>A_      |
| 103192 | 16 | 89898647 | G     | A  | 2124.19 | rs11648433 | Substitutor TCF25    | c.408G>A_      |
| 103248 | 16 | 90094032 | A     | C  | 182.41  | .          | Substitutor TUBB8P7  | c.10A>C_p      |
| 103585 | 17 | 2701491  | C     | T  | 2792.19 | .          | Substitutor CLUH     | c.660G>A_      |
| 103806 | 17 | 4242281  | C     | G  | 193.19  | .          | Substitutor ANKFY1   | c.304G>C_      |
| 103969 | 17 | 5034364  | G     | A  | 1116.19 | .          | Substitutor SLC52A1  | c.131-6C>T     |
| 104327 | 17 | 7674946  | GA    | G  | 1502.15 | .          | Deletion TP53        | c.107delT      |
| 105735 | 17 | 30442361 | G     | A  | 274.19  | .          | Substitutor CPD      | c.2284G>A      |
| 105782 | 17 | 31258365 | C     | T  | 1674.19 | .          | Substitutor NF1      | c.4132C>T      |
| 105833 | 17 | 31966130 | C     | CT | 147.5   | rs39780181 | Insertion SUZ12      | c.456-3dup     |
| 105987 | 17 | 35422236 | C     | T  | 941.19  | .          | Substitutor SLFN12   | c.793G>A_      |
| 106302 | 17 | 39723557 | C     | T  | 1362.19 | .          | Substitutor ERBB2    | c.1277C>T      |
| 106347 | 17 | 40035180 | C     | G  | 1295.19 | .          | Substitutor MED24    | c.457G>C_      |
| 106416 | 17 | 40834673 | C     | G  | 1745.19 | .          | Substitutor TMEM99   | c.157C>G_      |
| 106546 | 17 | 41350612 | G     | T  | 220.19  | .          | Substitutor KRT33A   | c.156C>A_      |
| 106773 | 17 | 42570133 | G     | A  | 642.19  | .          | Substitutor MLX      | c.628G>A_      |
| 106809 | 17 | 42839327 | G     | A  | 288.19  | .          | Substitutor PSME3    | c.631G>A_      |
| 107113 | 17 | 45245018 | C     | A  | 2090.19 | .          | Substitutor FMNL1    | c.2638C>A      |
| 107837 | 17 | 58206293 | G     | C  | 3138.19 | .          | Substitutor MKS1     | c.1548C>G      |
| 107884 | 17 | 59211420 | G     | A  | 1320.19 | .          | Substitutor SMG8     | c.1369G>A      |
| 107912 | 17 | 59910559 | C     | G  | 657.19  | .          | Substitutor RPS6KB1  | c.142-3C>G     |
| 107914 | 17 | 59962962 | C     | T  | 1258.19 | .          | Substitutor RNFT1    | c.379G>A_      |
| 107915 | 17 | 59963263 | C     | G  | 570.19  | .          | Substitutor RNFT1    | c.78G>C_f      |
| 107968 | 17 | 61683652 | AATAG | A  | 693.15  | .          | Deletion BRIP1       | c.3390_3391del |
| 108056 | 17 | 63822006 | G     | A  | 1393.19 | .          | Substitutor FTSJ3    | c.1453C>T      |
| 108075 | 17 | 63957312 | C     | T  | 1838.19 | .          | Substitutor SCN4A    | c.2226G>A      |
| 108192 | 17 | 67347350 | C     | T  | 1665.19 | .          | Substitutor PSMD12   | c.646G>A_      |
| 108313 | 17 | 70175391 | G     | A  | 1748.19 | .          | Substitutor KCNJ2    | c.352G>A_      |
| 108419 | 17 | 73447749 | C     | T  | 874.19  | .          | Substitutor SDK2     | c.480-1G>A     |
| 108513 | 17 | 74704787 | G     | C  | 2192.19 | .          | Substitutor CD300LF  | c.73C>G_f      |
| 109508 | 17 | 81252500 | C     | G  | 1829.19 | .          | Substitutor SLC38A10 | c.1640G>C      |
| 109509 | 17 | 81253124 | C     | A  | 794.19  | .          | Substitutor SLC38A10 | c.1405G>T      |
| 109676 | 17 | 82084663 | C     | T  | 1218.19 | .          | Substitutor FASN     | c.4618G>A      |
| 109750 | 17 | 82415451 | C     | T  | 1426.19 | .          | Substitutor OGFOD3   | c.251G>A_      |
| 109751 | 17 | 82415488 | C     | G  | 1328.19 | .          | Substitutor OGFOD3   | c.214G>C_      |
| 109752 | 17 | 82415582 | C     | G  | 830.19  | .          | Substitutor OGFOD3   | c.120G>C_      |
| 110735 | 18 | 23568939 | C     | G  | 276.19  | .          | Substitutor NPC1     | c.347G>C_      |
| 111921 | 18 | 68836860 | G     | A  | 1364.19 | .          | Substitutor CCDC102F | c.97G>A_f      |
| 112462 | 19 | 899677   | C     | G  | 564.19  | .          | Substitutor R3HDM4   | c.508G>C_      |
| 112599 | 19 | 1073988  | C     | T  | 696.19  | .          | Substitutor HMHA1    | c.845C>T_      |
| 112602 | 19 | 1074198  | C     | A  | 1488.19 | .          | Substitutor HMHA1    | c.966C>A_      |
| 112635 | 19 | 1117507  | G     | C  | 752.19  | .          | Substitutor SBNO2    | c.1528-8C>G    |
| 112840 | 19 | 2290252  | C     | T  | 1229.19 | .          | Substitutor LINGO3   | c.1525G>A      |

|        |    |          |    |    |         |            |                      |            |
|--------|----|----------|----|----|---------|------------|----------------------|------------|
| 113275 | 19 | 4684692  | G  | A  | 1588.19 | rs36930431 | Substitutor DPP9     | c.2149C>T  |
| 113283 | 19 | 4793182  | C  | G  | 634.19  | .          | Substitutor FEM1A    | c.1328C>G  |
| 113455 | 19 | 6374926  | G  | A  | 383.19  | .          | Substitutor ALKBH7   | c.436G>A_  |
| 113841 | 19 | 8882357  | T  | G  | 16.29   | .          | Substitutor MUC16    | c.41726A>  |
| 113842 | 19 | 8882365  | A  | G  | 24.2    | .          | Substitutor MUC16    | c.41718T>A |
| 113843 | 19 | 8882372  | C  | G  | 36.19   | .          | Substitutor MUC16    | c.41717-6C |
| 113899 | 19 | 8892955  | C  | G  | 943.19  | .          | Substitutor MUC16    | c.40009G>  |
| 114185 | 19 | 10986282 | G  | A  | 2314.19 | .          | Substitutor SMARCA4  | c.449G>A_  |
| 114395 | 19 | 12628250 | G  | C  | 1725.19 | .          | Substitutor ZNF791   | c.721G>C_  |
| 114426 | 19 | 12933564 | G  | A  | 873.19  | .          | Substitutor FARSA    | c.133C>T_  |
| 115133 | 19 | 17649539 | C  | G  | 1820.19 | .          | Substitutor UNC13A   | c.1488G>C  |
| 115740 | 19 | 22758375 | C  | T  | 266.19  | .          | Substitutor ZNF99    | c.1261G>A  |
| 116116 | 19 | 34454426 | CT | C  | 17.23   | .          | Deletion UBA2        | c.1133-6de |
| 116556 | 19 | 38374713 | C  | G  | 990.19  | .          | Substitutor PSMD8    | c.112C>G_  |
| 116697 | 19 | 39314064 | C  | T  | 2128.19 | .          | Substitutor LRFN1    | c.1273G>A  |
| 116821 | 19 | 39971220 | C  | G  | 1191.19 | .          | Substitutor PSMC4    | c.18C>G_   |
| 116903 | 19 | 40613073 | G  | A  | 1701.19 | .          | Substitutor LTBP4    | c.2509G>A  |
| 117105 | 19 | 42199680 | C  | T  | 1616.19 | .          | Substitutor DEDD2    | c.739G>A_  |
| 117121 | 19 | 42294012 | C  | T  | 1861.19 | .          | Substitutor CIC      | c.6836C>T  |
| 117412 | 19 | 44066195 | C  | G  | 658.19  | .          | Substitutor ZNF223   | c.367C>G_  |
| 117448 | 19 | 44157289 | G  | C  | 524.19  | .          | Substitutor ZNF234   | c.1273G>C  |
| 117697 | 19 | 46376458 | G  | C  | 2578.19 | .          | Substitutor PPP5C    | c.517G>C_  |
| 117814 | 19 | 47456970 | C  | T  | 1450.19 | .          | Substitutor SLC8A2   | c.568G>A_  |
| 119794 | 19 | 54939737 | G  | T  | 260.19  | .          | Substitutor NLRP7    | c.1082C>A  |
| 119795 | 19 | 54939872 | G  | A  | 992.19  | .          | Substitutor NLRP7    | c.947C>T_  |
| 119996 | 19 | 55678638 | C  | T  | 1589.19 | .          | Substitutor EPN1     | c.11C>T_p  |
| 120098 | 19 | 56384763 | C  | G  | 390.19  | .          | Substitutor ZNF582   | c.654G>C_  |
| 120216 | 19 | 57443564 | C  | A  | 1217.19 | .          | Substitutor ZNF749   | c.416C>A_  |
| 120218 | 19 | 57443826 | C  | A  | 1014.19 | .          | Substitutor ZNF749   | c.678C>A_  |
| 120220 | 19 | 57444181 | C  | T  | 927.19  | .          | Substitutor ZNF749   | c.1033C>T  |
| 120221 | 19 | 57445234 | C  | T  | 540.19  | .          | Substitutor ZNF749   | c.2086C>T  |
| 120222 | 19 | 57445397 | C  | T  | 2397.19 | .          | Substitutor ZNF749   | c.2249C>T  |
| 120228 | 19 | 57455861 | G  | A  | 662.19  | .          | Substitutor VN1R1    | c.626C>T_  |
| 120229 | 19 | 57455977 | G  | T  | 742.19  | .          | Substitutor VN1R1    | c.510C>A_  |
| 120445 | 19 | 58088799 | G  | C  | 1448.19 | .          | Substitutor ZSCAN18  | c.610C>G_  |
| 120580 | 19 | 58562101 | G  | A  | 686.19  | .          | Substitutor MZF1     | c.2176C>T  |
| 120621 | 20 | 298007   | G  | A  | 949.19  | .          | Substitutor ZCCHC3   | c.421G>A_  |
| 120865 | 20 | 3122367  | C  | T  | 1527.19 | .          | Substitutor UBOX5    | c.272G>A_  |
| 121295 | 20 | 17436826 | G  | C  | 1224.19 | .          | Substitutor PCSK2    | c.828G>C_  |
| 122155 | 20 | 36548031 | G  | A  | 531.19  | .          | Substitutor MYL9     | c.185-1G>  |
| 122265 | 20 | 38525441 | G  | A  | 1766.19 | .          | Substitutor RALGAPB  | c.1825G>A  |
| 123235 | 20 | 62656851 | C  | T  | 2050.19 | .          | Substitutor SLCO4A1  | c.397C>T_  |
| 123377 | 20 | 63313883 | G  | A  | 1528.19 | rs37015131 | Substitutor COL20A1  | c.2350G>A  |
| 124069 | 21 | 32325356 | G  | A  | 1019.19 | .          | Substitutor URB1     | c.4994C>T  |
| 125042 | 21 | 44773637 | C  | T  | 1024.19 | .          | Substitutor UBE2G2   | c.295G>A_  |
| 125364 | 21 | 46558394 | G  | C  | 767.19  | .          | Substitutor DIP2A    | c.3957+1G  |
| 126177 | 22 | 22195973 | C  | T  | 1641.19 | .          | Substitutor IGLV6-57 | c.50C>T_p  |
| 127919 | 22 | 38089553 | G  | A  | 123.19  | .          | Substitutor BAIAP2L2 | c.734C>T_  |
| 128335 | 22 | 42128812 | A  | G  | 44.19   | rs19953511 | Substitutor CYP2D6   | c.638T>C_  |
| 128337 | 22 | 42128818 | T  | TC | 65.15   | .          | Insertion CYP2D6     | c.631dupG  |
| 129418 | 23 | 3311198  | C  | T  | 1838.19 | .          | Substitutor MXRA5    | c.7005G>A  |
| 129609 | 23 | 12716331 | T  | A  | 1567.19 | .          | Substitutor FRMPD4   | c.1752T>A  |
| 129813 | 23 | 23001186 | G  | A  | 1067.19 | .          | Substitutor DDX53    | c.1129G>A  |
| 129903 | 23 | 30846641 | C  | T  | 404.19  | .          | Substitutor TAB3     | c.1714G>A  |
| 129994 | 23 | 40697186 | G  | A  | 686.19  | .          | Substitutor MED14    | c.1491-3C> |

|        |    |          |    |   |         |            |                     |            |
|--------|----|----------|----|---|---------|------------|---------------------|------------|
| 130004 | 23 | 41148376 | G  | A | 368.19  | .          | Substitutor USP9X   | c.1427G>A  |
| 130231 | 23 | 48975303 | G  | C | 948.19  | .          | Substitutor GRIPAP1 | c.2192C>G  |
| 130499 | 23 | 69506075 | G  | A | 1598.19 | .          | Substitutor FAM155B | c.793G>A_  |
| 130806 | 23 | 1.01E+08 | C  | T | 3446.19 | .          | Substitutor CSTF2   | c.50C>T_p  |
| 131006 | 23 | 1.16E+08 | G  | C | 1042.19 | .          | Substitutor PLS3    | c.1467G>C  |
| 131065 | 23 | 1.19E+08 | G  | T | 203.19  | .          | Substitutor SLC25A5 | c.361G>T_  |
| 131068 | 23 | 1.19E+08 | G  | A | 84.19   | rs2005503; | Substitutor SLC25A5 | c.413G>A_  |
| 131071 | 23 | 1.19E+08 | G  | A | 75.19   | rs2010502; | Substitutor SLC25A5 | c.446G>A_  |
| 131072 | 23 | 1.19E+08 | CT | C | 66.15   | .          | Deletion SLC25A5    | c.450delT  |
| 131073 | 23 | 1.19E+08 | G  | A | 42.19   | rs1996788; | Substitutor SLC25A5 | c.472G>A_  |
| 131355 | 23 | 1.4E+08  | G  | C | 425.19  | .          | Substitutor MCF2    | c.1544-6C> |
| 131463 | 23 | 1.46E+08 | C  | A | 1661.19 | .          | Substitutor SLITRK2 | c.2402C>A  |



| Class | normGeno | normAlt | normTot | tumorGenc | tumorAlt | tumorTot | Somatic | captureKit | normClass |
|-------|----------|---------|---------|-----------|----------|----------|---------|------------|-----------|
| NSY   | C/C      | 0       | 171     | C/T       | 63       | 86       | TRUE    | 1          | R/R       |
| NSY   | C/C      | 0       | 94      | C/G       | 26       | 44       | TRUE    | 1          | R/R       |
| NSY   | G/G      | 0       | 111     | G/C       | 45       | 64       | TRUE    | 1          | R/R       |
| NSY   | C/C      | 0       | 180     | C/G       | 64       | 97       | TRUE    | 1          | R/R       |
| NSY   | C/C      | 0       | 49      | C/G       | 18       | 24       | TRUE    | 1          | R/R       |
| NSY   | G/G      | 0       | 88      | G/A       | 16       | 25       | TRUE    | 0          | R/R       |
| NSY   | C/C      | 0       | 49      | C/T       | 25       | 39       | TRUE    | 0          | R/R       |
| SS    | G/G      | 0       | 103     | G/C       | 33       | 46       | TRUE    | 1          | R/R       |
| NSY   | C/C      | 0       | 305     | C/G       | 95       | 163      | TRUE    | 1          | R/R       |
| NSY   | C/C      | 0       | 103     | C/T       | 24       | 38       | TRUE    | 1          | R/R       |
| SS    | C/C      | 0       | 80      | C/G       | 35       | 50       | TRUE    | 1          | R/R       |
| NSY   | C/C      | 0       | 83      | C/T       | 29       | 38       | TRUE    | 1          | R/R       |
| EE    | C/C      | 0       | 107     | C/G       | 47       | 76       | TRUE    | 0          | R/R       |
| SS    | G/G      | 0       | 129     | G/A       | 53       | 72       | TRUE    | 1          | R/R       |
| ESS   | G/G      | 1       | 16      | G/C       | 2        | 16       | TRUE    | 0          | R/R       |
| NSY   | T/T      | 1       | 23      | T/C       | 3        | 16       | TRUE    | 0          | R/R       |
| SS    | C/C      | 0       | 25      | C/T       | 13       | 53       | TRUE    | 1          | R/R       |
| NSY   | C/C      | 2       | 26      | C/T       | 21       | 56       | TRUE    | 0          | R/R       |
| NSY   | C/C      | 2       | 25      | C/T       | 11       | 38       | TRUE    | 0          | R/R       |
| NSY   | G/G      | 0       | 230     | G/C       | 72       | 376      | TRUE    | 1          | R/R       |
| ESS   | C/C      | 0       | 55      | C/T       | 23       | 96       | TRUE    | 1          | R/R       |
| SG    | C/C      | 0       | 142     | C/A       | 68       | 259      | TRUE    | 1          | R/R       |
| SG    | G/G      | 0       | 40      | G/A       | 11       | 53       | TRUE    | 1          | R/R       |
| SS    | C/C      | 0       | 204     | C/T       | 51       | 298      | TRUE    | 1          | R/R       |
| NSY   | G/G      | 0       | 45      | G/A       | 14       | 95       | TRUE    | 1          | R/R       |
| NSY   | G/G      | 0       | 115     | G/A       | 32       | 171      | TRUE    | 1          | R/R       |
| NSY   | G/G      | 0       | 160     | G/C       | 40       | 249      | TRUE    | 1          | R/R       |
| NSY   | G/G      | 0       | 195     | G/A       | 59       | 349      | TRUE    | 1          | R/R       |
| NSY   | C/C      | 0       | 98      | C/G       | 46       | 207      | TRUE    | 1          | R/R       |
| NSY   | C/C      | 0       | 74      | C/T       | 37       | 132      | TRUE    | 1          | R/R       |
| NSY   | C/C      | 0       | 55      | C/G       | 25       | 102      | TRUE    | 1          | R/R       |
| NSY   | C/C      | 0       | 34      | C/G       | 19       | 81       | TRUE    | 1          | R/R       |
| SG    | G/G      | 0       | 68      | G/T       | 29       | 121      | TRUE    | 0          | R/R       |
| SG    | C/C      | 0       | 82      | C/T       | 33       | 150      | TRUE    | 1          | R/R       |
| NSY   | C/C      | 0       | 221     | C/T       | 157      | 344      | TRUE    | 1          | R/R       |
| NSY   | G/G      | 1       | 163     | G/A       | 44       | 243      | TRUE    | 1          | R/R       |
| NSY   | G/G      | 0       | 104     | G/C       | 50       | 181      | TRUE    | 1          | R/R       |
| NSY   | C/C      | 0       | 152     | C/T       | 42       | 198      | TRUE    | 1          | R/R       |
| NSY   | C/C      | 0       | 267     | C/G       | 101      | 413      | TRUE    | 1          | R/R       |
| NSY   | C/C      | 0       | 88      | C/G       | 34       | 122      | TRUE    | 1          | R/R       |
| NSY   | G/G      | 0       | 313     | G/A       | 100      | 528      | TRUE    | 1          | R/R       |
| SG    | G/G      | 0       | 53      | G/T       | 19       | 71       | TRUE    | 0          | R/R       |
| NSY   | C/C      | 0       | 182     | C/T       | 115      | 308      | TRUE    | 1          | R/R       |
| NSY   | G/G      | 0       | 22      | G/A       | 5        | 35       | TRUE    | 0          | R/R       |
| NSY   | C/C      | 0       | 59      | C/T       | 45       | 106      | TRUE    | 1          | R/R       |
| NSY   | C/C      | 0       | 85      | C/G       | 42       | 153      | TRUE    | 1          | R/R       |
| NSY   | A/A      | 1       | 21      | A/G       | 9        | 45       | TRUE    | 0          | R/R       |
| NSY   | G/G      | 0       | 159     | G/A       | 51       | 148      | TRUE    | 1          | R/R       |
| NSY   | G/G      | 0       | 156     | G/A       | 47       | 137      | TRUE    | 1          | R/R       |
| NSY   | G/G      | 0       | 226     | G/A       | 72       | 228      | TRUE    | 1          | R/R       |
| NSY   | G/G      | 0       | 115     | G/C       | 61       | 122      | TRUE    | 1          | R/R       |
| NSY   | C/C      | 0       | 102     | C/T       | 36       | 91       | TRUE    | 1          | R/R       |
| IM    | G/G      | 0       | 48      | G/A       | 16       | 43       | TRUE    | 1          | R/R       |
| NSY   | C/C      | 0       | 143     | C/T       | 49       | 110      | TRUE    | 1          | R/R       |

|     |       |   |         |     |     |      |       |
|-----|-------|---|---------|-----|-----|------|-------|
| NSY | C/C   | 0 | 205 C/T | 65  | 178 | TRUE | 0 R/R |
| SG  | C/C   | 0 | 110 C/T | 41  | 102 | TRUE | 1 R/R |
| NSY | C/C   | 0 | 155 C/T | 40  | 85  | TRUE | 1 R/R |
| NSY | C/C   | 0 | 160 C/G | 51  | 130 | TRUE | 1 R/R |
| NSY | C/C   | 0 | 118 C/G | 43  | 106 | TRUE | 1 R/R |
| NSY | C/C   | 0 | 135 C/T | 56  | 125 | TRUE | 1 R/R |
| NSY | G/G   | 0 | 84 G/A  | 43  | 98  | TRUE | 1 R/R |
| NSY | C/C   | 0 | 67 C/T  | 26  | 63  | TRUE | 0 R/R |
| SS  | CT/CT | 2 | 19 CT/C | 9   | 19  | TRUE | 1 R/R |
| NSY | G/G   | 2 | 97 G/C  | 9   | 66  | TRUE | 1 R/R |
| SG  | C/C   | 0 | 130 C/T | 45  | 136 | TRUE | 1 R/R |
| NSY | G/G   | 0 | 74 G/T  | 29  | 64  | TRUE | 1 R/R |
| NSY | C/C   | 0 | 57 C/T  | 19  | 47  | TRUE | 1 R/R |
| SS  | TA/TA | 1 | 31 TA/T | 5   | 24  | TRUE | 1 R/R |
| NSY | C/C   | 0 | 86 C/T  | 34  | 87  | TRUE | 0 R/R |
| NSY | C/C   | 0 | 64 C/G  | 29  | 90  | TRUE | 1 R/R |
| NSY | G/G   | 0 | 115 G/A | 27  | 101 | TRUE | 1 R/R |
| NSY | G/G   | 0 | 92 G/A  | 26  | 78  | TRUE | 1 R/R |
| NSY | C/C   | 0 | 185 C/T | 54  | 157 | TRUE | 1 R/R |
| NSY | C/C   | 0 | 111 C/T | 41  | 111 | TRUE | 1 R/R |
| NSY | G/G   | 0 | 144 G/C | 58  | 132 | TRUE | 1 R/R |
| NSY | G/G   | 0 | 34 G/T  | 9   | 29  | TRUE | 1 R/R |
| NSY | C/C   | 0 | 79 C/T  | 22  | 60  | TRUE | 1 R/R |
| NSY | C/C   | 1 | 76 C/T  | 26  | 66  | TRUE | 1 R/R |
| NSY | G/G   | 0 | 105 G/C | 36  | 97  | TRUE | 1 R/R |
| NSY | G/G   | 0 | 46 G/C  | 17  | 45  | TRUE | 1 R/R |
| NSY | C/C   | 0 | 245 C/G | 80  | 201 | TRUE | 1 R/R |
| NSY | C/C   | 0 | 200 C/T | 64  | 165 | TRUE | 1 R/R |
| NSY | A/A   | 0 | 164 A/C | 55  | 138 | TRUE | 1 R/R |
| NSY | G/G   | 0 | 218 G/A | 58  | 179 | TRUE | 1 R/R |
| NSY | G/G   | 0 | 59 G/C  | 20  | 49  | TRUE | 1 R/R |
| NSY | G/G   | 0 | 376 G/C | 119 | 309 | TRUE | 1 R/R |
| SS  | G/G   | 0 | 139 G/A | 55  | 112 | TRUE | 1 R/R |
| NSY | C/C   | 0 | 123 C/T | 61  | 147 | TRUE | 1 R/R |
| NSY | G/G   | 0 | 159 G/A | 40  | 107 | TRUE | 1 R/R |
| NSY | C/C   | 0 | 22 C/G  | 7   | 18  | TRUE | 0 R/R |
| NSY | C/C   | 0 | 68 C/T  | 33  | 92  | TRUE | 1 R/R |
| NSY | G/G   | 0 | 38 G/C  | 27  | 78  | TRUE | 1 R/R |
| NSY | C/C   | 0 | 157 C/A | 62  | 135 | TRUE | 1 R/R |
| NSY | G/G   | 0 | 32 G/C  | 9   | 30  | TRUE | 1 R/R |
| NSY | G/G   | 0 | 111 G/C | 51  | 107 | TRUE | 1 R/R |
| NSY | G/G   | 0 | 35 G/A  | 15  | 46  | TRUE | 1 R/R |
| NSY | C/C   | 0 | 67 C/T  | 22  | 71  | TRUE | 1 R/R |
| SS5 | G/G   | 0 | 35 G/T  | 19  | 38  | TRUE | 1 R/R |
| NSY | C/C   | 0 | 95 C/T  | 35  | 82  | TRUE | 1 R/R |
| SS  | G/G   | 0 | 117 G/C | 35  | 116 | TRUE | 1 R/R |
| NSY | G/G   | 0 | 44 G/C  | 13  | 37  | TRUE | 1 R/R |
| NSY | G/G   | 0 | 56 G/C  | 24  | 60  | TRUE | 1 R/R |
| NSY | G/G   | 0 | 130 G/C | 56  | 145 | TRUE | 1 R/R |
| NSY | C/C   | 0 | 151 C/T | 74  | 188 | TRUE | 1 R/R |
| NSY | G/G   | 0 | 47 G/A  | 12  | 36  | TRUE | 1 R/R |
| NSY | G/G   | 0 | 79 G/C  | 19  | 60  | TRUE | 1 R/R |
| NSY | G/G   | 0 | 224 G/T | 55  | 192 | TRUE | 1 R/R |
| NSY | G/G   | 0 | 62 G/A  | 21  | 57  | TRUE | 1 R/R |
| SG  | C/C   | 0 | 219 C/G | 69  | 126 | TRUE | 1 R/R |

|     |       |   |         |    |     |      |       |
|-----|-------|---|---------|----|-----|------|-------|
| SS  | TA/TA | 1 | 29 TA/T | 5  | 23  | TRUE | 1 R/R |
| NSY | G/G   | 0 | 159 G/A | 50 | 87  | TRUE | 1 R/R |
| NSY | C/C   | 0 | 141 C/T | 66 | 141 | TRUE | 1 R/R |
| SS  | C/C   | 0 | 38 C/G  | 8  | 27  | TRUE | 1 R/R |
| NSY | C/C   | 0 | 130 C/G | 51 | 150 | TRUE | 1 R/R |
| SS  | G/G   | 0 | 160 G/A | 64 | 139 | TRUE | 1 R/R |
| NSY | C/C   | 0 | 154 C/T | 38 | 114 | TRUE | 1 R/R |
| SG  | G/G   | 0 | 77 G/A  | 32 | 61  | TRUE | 1 R/R |
| NSY | C/C   | 1 | 96 C/T  | 27 | 73  | TRUE | 1 R/R |
| NSY | C/C   | 0 | 64 C/G  | 26 | 74  | TRUE | 1 R/R |
| NSY | C/C   | 0 | 239 C/T | 82 | 267 | TRUE | 1 R/R |
| SS  | C/C   | 0 | 172 C/T | 29 | 95  | TRUE | 1 R/R |
| NSY | A/A   | 1 | 38 A/G  | 4  | 44  | TRUE | 0 R/R |
| NSY | C/C   | 1 | 37 C/A  | 4  | 42  | TRUE | 0 R/R |
| NSY | C/C   | 0 | 56 C/T  | 22 | 55  | TRUE | 0 R/R |
| NSY | C/C   | 0 | 107 C/T | 46 | 102 | TRUE | 1 R/R |
| NSY | G/G   | 0 | 197 G/T | 58 | 164 | TRUE | 1 R/R |
| NSY | G/G   | 0 | 171 G/A | 65 | 161 | TRUE | 1 R/R |
| NSY | C/C   | 0 | 105 C/T | 54 | 125 | TRUE | 1 R/R |
| NSY | C/C   | 0 | 80 C/G  | 30 | 66  | TRUE | 1 R/R |
| SS  | G/G   | 0 | 65 G/T  | 34 | 89  | TRUE | 0 R/R |
| NSY | C/C   | 0 | 236 C/T | 96 | 220 | TRUE | 1 R/R |
| NSY | G/G   | 0 | 191 G/A | 78 | 164 | TRUE | 1 R/R |
| NSY | C/C   | 0 | 194 C/A | 75 | 213 | TRUE | 1 R/R |
| NSY | C/C   | 0 | 175 C/T | 57 | 167 | TRUE | 1 R/R |
| NSY | C/C   | 0 | 118 C/T | 33 | 93  | TRUE | 1 R/R |
| NSY | G/G   | 0 | 65 G/A  | 14 | 49  | TRUE | 1 R/R |
| SG  | C/C   | 0 | 113 C/A | 36 | 82  | TRUE | 1 R/R |
| NSY | G/G   | 2 | 123 G/C | 7  | 86  | TRUE | 0 R/R |
| NSY | C/C   | 2 | 124 C/G | 7  | 82  | TRUE | 0 R/R |
| NSY | G/G   | 0 | 61 G/C  | 24 | 62  | TRUE | 1 R/R |
| NSY | G/G   | 0 | 173 G/A | 54 | 154 | TRUE | 1 R/R |
| SG  | G/G   | 0 | 119 G/T | 31 | 87  | TRUE | 1 R/R |
| ESS | C/C   | 0 | 159 C/G | 70 | 166 | TRUE | 1 R/R |
| SS  | C/C   | 1 | 39 C/CA | 4  | 25  | TRUE | 1 R/R |
| SS  | G/G   | 1 | 39 G/A  | 2  | 23  | TRUE | 1 R/R |
| SS  | G/G   | 1 | 22 G/A  | 3  | 17  | TRUE | 1 R/R |
| SS  | A/A   | 1 | 20 A/G  | 3  | 16  | TRUE | 1 R/R |
| NSY | C/C   | 2 | 80 C/T  | 8  | 80  | TRUE | 1 R/R |
| NSY | G/G   | 1 | 155 G/A | 52 | 117 | TRUE | 1 R/R |
| NSY | C/C   | 2 | 74 C/G  | 26 | 77  | TRUE | 1 R/R |
| NSY | G/G   | 0 | 163 G/C | 62 | 150 | TRUE | 1 R/R |
| SS  | G/G   | 0 | 82 G/C  | 16 | 77  | TRUE | 0 R/R |
| NSY | G/G   | 0 | 38 G/A  | 13 | 34  | TRUE | 1 R/R |
| NSY | G/G   | 1 | 182 G/A | 48 | 157 | TRUE | 1 R/R |
| SS  | C/C   | 0 | 118 C/T | 55 | 114 | TRUE | 1 R/R |
| NSY | C/C   | 0 | 166 C/T | 60 | 149 | TRUE | 1 R/R |
| NSY | C/C   | 0 | 47 C/G  | 18 | 51  | TRUE | 1 R/R |
| NSY | C/C   | 0 | 77 C/A  | 20 | 64  | TRUE | 0 R/R |
| SS  | C/C   | 0 | 63 C/T  | 27 | 71  | TRUE | 1 R/R |
| NSY | C/C   | 0 | 20 C/G  | 9  | 20  | TRUE | 1 R/R |
| NSY | G/G   | 0 | 152 G/C | 55 | 146 | TRUE | 1 R/R |
| SG  | G/G   | 0 | 167 G/A | 66 | 177 | TRUE | 1 R/R |
| NSY | C/C   | 0 | 61 C/T  | 37 | 96  | TRUE | 1 R/R |
| NSY | C/C   | 0 | 296 C/T | 47 | 278 | TRUE | 1 R/R |

|     |       |   |         |    |     |      |       |
|-----|-------|---|---------|----|-----|------|-------|
| NSY | G/G   | 0 | 51 G/C  | 7  | 26  | TRUE | 1 R/R |
| NSY | C/C   | 0 | 82 C/T  | 27 | 73  | TRUE | 1 R/R |
| NSY | C/C   | 0 | 133 C/T | 53 | 140 | TRUE | 1 R/R |
| SS  | GT/GT | 2 | 27 GT/G | 10 | 39  | TRUE | 1 R/R |
| NSY | C/C   | 2 | 30 C/T  | 3  | 28  | TRUE | 0 R/R |
| NSY | C/C   | 1 | 17 C/T  | 3  | 26  | TRUE | 0 R/R |
| NSY | C/C   | 2 | 39 C/A  | 8  | 45  | TRUE | 1 R/R |
| NSY | C/C   | 0 | 253 C/T | 91 | 223 | TRUE | 1 R/R |
| NSY | G/G   | 0 | 34 G/A  | 16 | 40  | TRUE | 0 R/R |
| SS  | G/G   | 0 | 119 G/A | 38 | 102 | TRUE | 1 R/R |
| SS  | G/G   | 0 | 142 G/C | 59 | 148 | TRUE | 1 R/R |
| NSY | C/C   | 0 | 132 C/G | 44 | 117 | TRUE | 1 R/R |
| SG  | G/G   | 0 | 155 G/T | 52 | 152 | TRUE | 1 R/R |
| NSY | C/C   | 0 | 134 C/G | 55 | 148 | TRUE | 1 R/R |
| NSY | G/G   | 0 | 175 G/A | 51 | 128 | TRUE | 1 R/R |
| NSY | G/G   | 0 | 99 G/C  | 38 | 112 | TRUE | 1 R/R |
| NSY | C/C   | 0 | 161 C/G | 62 | 165 | TRUE | 1 R/R |
| NSY | C/C   | 0 | 98 C/T  | 41 | 95  | TRUE | 1 R/R |
| NSY | G/G   | 0 | 54 G/A  | 17 | 55  | TRUE | 0 R/R |
| NSY | G/G   | 0 | 155 G/C | 70 | 170 | TRUE | 1 R/R |
| NSY | G/G   | 0 | 183 G/A | 80 | 187 | TRUE | 1 R/R |
| NSY | C/C   | 0 | 47 C/T  | 16 | 45  | TRUE | 1 R/R |
| SG  | G/G   | 0 | 185 G/A | 61 | 176 | TRUE | 1 R/R |
| NSY | C/C   | 0 | 209 C/G | 59 | 157 | TRUE | 1 R/R |
| NSY | C/C   | 0 | 62 C/G  | 21 | 58  | TRUE | 1 R/R |
| NSY | C/C   | 0 | 83 C/G  | 25 | 69  | TRUE | 1 R/R |
| SS  | CT/CT | 0 | 22 CT/C | 4  | 31  | TRUE | 1 R/R |
| NSY | G/G   | 0 | 132 G/C | 34 | 126 | TRUE | 1 R/R |
| EE  | C/C   | 0 | 77 C/T  | 23 | 74  | TRUE | 1 R/R |
| SG  | C/C   | 0 | 56 C/T  | 28 | 78  | TRUE | 1 R/R |
| SS  | C/C   | 0 | 56 C/T  | 23 | 50  | TRUE | 1 R/R |
| NSY | C/C   | 1 | 17 C/A  | 7  | 19  | TRUE | 0 R/R |
| NSY | G/G   | 0 | 150 G/A | 36 | 124 | TRUE | 1 R/R |
| SS  | A/A   | 1 | 21 A/T  | 3  | 16  | TRUE | 1 R/R |
| NSY | C/C   | 0 | 153 C/G | 43 | 105 | TRUE | 1 R/R |
| NSY | C/C   | 0 | 65 C/T  | 20 | 49  | TRUE | 1 R/R |
| NSY | C/C   | 0 | 135 C/G | 40 | 121 | TRUE | 1 R/R |
| NSY | G/G   | 0 | 24 G/A  | 7  | 19  | TRUE | 1 R/R |
| SS  | AT/AT | 2 | 24 AT/A | 6  | 30  | TRUE | 1 R/R |
| NSY | C/C   | 0 | 117 C/G | 30 | 115 | TRUE | 1 R/R |
| NSY | C/C   | 1 | 180 C/G | 56 | 165 | TRUE | 1 R/R |
| NSY | G/G   | 0 | 54 G/C  | 16 | 40  | TRUE | 1 R/R |
| NSY | C/C   | 0 | 152 C/T | 37 | 97  | TRUE | 1 R/R |
| NSY | G/G   | 0 | 231 G/A | 73 | 164 | TRUE | 1 R/R |
| NSY | G/G   | 0 | 34 G/C  | 12 | 27  | TRUE | 1 R/R |
| ESS | G/G   | 0 | 38 G/C  | 22 | 48  | TRUE | 1 R/R |
| NSY | G/G   | 0 | 96 G/A  | 36 | 104 | TRUE | 1 R/R |
| NSY | G/G   | 0 | 145 G/C | 56 | 163 | TRUE | 1 R/R |
| NSY | G/G   | 0 | 107 G/C | 46 | 120 | TRUE | 1 R/R |
| NSY | C/C   | 0 | 103 C/A | 35 | 100 | TRUE | 1 R/R |
| SS  | G/G   | 0 | 87 G/C  | 31 | 84  | TRUE | 1 R/R |
| NSY | C/C   | 0 | 141 C/G | 44 | 126 | TRUE | 1 R/R |
| NSY | C/C   | 0 | 68 C/G  | 18 | 58  | TRUE | 1 R/R |
| NSY | C/C   | 0 | 49 C/T  | 12 | 32  | TRUE | 1 R/R |
| NSY | G/G   | 0 | 85 G/C  | 36 | 83  | TRUE | 1 R/R |

|     |         |   |           |     |     |      |       |
|-----|---------|---|-----------|-----|-----|------|-------|
| NSY | G/G     | 0 | 304 G/C   | 108 | 261 | TRUE | 1 R/R |
| NSY | G/G     | 0 | 167 G/C   | 61  | 181 | TRUE | 1 R/R |
| NSY | G/G     | 0 | 40 G/A    | 16  | 36  | TRUE | 1 R/R |
| SS  | G/G     | 0 | 270 G/T   | 63  | 182 | TRUE | 1 R/R |
| SS5 | G/G     | 0 | 173 G/A   | 47  | 114 | TRUE | 1 R/R |
| NSY | G/G     | 0 | 194 G/C   | 53  | 128 | TRUE | 1 R/R |
| NSY | G/G     | 0 | 215 G/C   | 71  | 202 | TRUE | 1 R/R |
| NSY | G/G     | 0 | 29 G/A    | 11  | 25  | TRUE | 1 R/R |
| SG  | C/C     | 0 | 75 C/T    | 26  | 58  | TRUE | 1 R/R |
| EE  | C/C     | 0 | 201 C/A   | 68  | 168 | TRUE | 1 R/R |
| NSY | C/C     | 0 | 125 C/G   | 43  | 126 | TRUE | 1 R/R |
| NSY | C/C     | 0 | 104 C/T   | 46  | 126 | TRUE | 1 R/R |
| NSY | G/G     | 0 | 175 G/C   | 73  | 146 | TRUE | 1 R/R |
| NSY | C/C     | 0 | 133 C/G   | 59  | 154 | TRUE | 1 R/R |
| NSY | C/C     | 2 | 121 C/T   | 51  | 127 | TRUE | 1 R/R |
| NSY | G/G     | 0 | 78 G/A    | 32  | 79  | TRUE | 1 R/R |
| NSY | T/T     | 0 | 102 T/C   | 55  | 122 | TRUE | 1 R/R |
| NSY | G/G     | 0 | 333 G/C   | 107 | 290 | TRUE | 1 R/R |
| NSY | G/G     | 0 | 48 G/A    | 8   | 47  | TRUE | 1 R/R |
| NSY | G/G     | 0 | 38 G/A    | 6   | 36  | TRUE | 1 R/R |
| NSY | G/G     | 0 | 34 G/T    | 5   | 34  | TRUE | 1 R/R |
| IF  | CGGG/CG | 0 | 34 CGGG/C | 5   | 35  | TRUE | 1 R/R |
| NSY | T/T     | 0 | 20 T/C    | 4   | 25  | TRUE | 1 R/R |
| NSY | C/C     | 0 | 15 C/T    | 4   | 24  | TRUE | 1 R/R |
| NSY | C/C     | 0 | 45 C/T    | 30  | 68  | TRUE | 1 R/R |
| NSY | C/C     | 0 | 153 C/G   | 39  | 108 | TRUE | 1 R/R |
| NSY | G/G     | 0 | 155 G/T   | 38  | 141 | TRUE | 1 R/R |
| NSY | G/G     | 0 | 55 G/C    | 9   | 45  | TRUE | 1 R/R |
| NSY | C/C     | 0 | 118 C/T   | 32  | 91  | TRUE | 1 R/R |
| NSY | G/G     | 0 | 57 G/C    | 21  | 49  | TRUE | 1 R/R |
| NSY | C/C     | 1 | 46 C/T    | 23  | 73  | TRUE | 1 R/R |
| NSY | C/C     | 0 | 115 C/T   | 20  | 61  | TRUE | 1 R/R |
| NSY | A/A     | 1 | 36 A/G    | 6   | 28  | TRUE | 1 R/R |
| NSY | T/T     | 2 | 38 T/C    | 7   | 29  | TRUE | 1 R/R |
| NSY | G/G     | 0 | 178 G/A   | 49  | 189 | TRUE | 1 R/R |
| NSY | C/C     | 0 | 110 C/G   | 42  | 94  | TRUE | 1 R/R |
| NSY | C/C     | 0 | 134 C/G   | 49  | 136 | TRUE | 1 R/R |
| SS  | C/C     | 0 | 99 C/G    | 30  | 121 | TRUE | 1 R/R |
| NSY | G/G     | 0 | 60 G/A    | 22  | 56  | TRUE | 1 R/R |
| NSY | C/C     | 0 | 43 C/G    | 25  | 32  | TRUE | 1 R/R |
| NSY | C/C     | 0 | 89 C/T    | 43  | 55  | TRUE | 1 R/R |
| NSY | G/G     | 0 | 174 G/C   | 44  | 76  | TRUE | 1 R/R |
| NSY | G/G     | 0 | 67 G/A    | 22  | 34  | TRUE | 1 R/R |
| NSY | G/G     | 0 | 119 G/A   | 42  | 101 | TRUE | 1 R/R |
| NSY | G/G     | 0 | 139 G/A   | 61  | 161 | TRUE | 1 R/R |
| ESS | G/G     | 0 | 23 G/A    | 7   | 23  | TRUE | 1 R/R |
| NSY | G/G     | 0 | 31 G/C    | 10  | 33  | TRUE | 1 R/R |
| NSY | C/C     | 0 | 64 C/T    | 22  | 62  | TRUE | 1 R/R |
| NSY | C/C     | 0 | 144 C/T   | 55  | 133 | TRUE | 1 R/R |
| NSY | C/C     | 0 | 292 C/T   | 79  | 202 | TRUE | 1 R/R |
| NSY | C/C     | 0 | 168 C/T   | 45  | 144 | TRUE | 1 R/R |
| SS  | C/C     | 0 | 44 C/G    | 21  | 45  | TRUE | 1 R/R |
| NSY | C/C     | 0 | 145 C/T   | 47  | 67  | TRUE | 1 R/R |
| NSY | G/G     | 0 | 104 G/C   | 45  | 64  | TRUE | 1 R/R |
| NSY | C/C     | 0 | 27 C/T    | 29  | 39  | TRUE | 0 R/R |

|     |          |   |            |     |     |      |       |
|-----|----------|---|------------|-----|-----|------|-------|
| NSY | C/C      | 0 | 58 C/G     | 27  | 32  | TRUE | 1 R/R |
| NSY | C/C      | 0 | 151 C/G    | 118 | 149 | TRUE | 1 R/R |
| NSY | G/G      | 0 | 302 G/T    | 102 | 162 | TRUE | 1 R/R |
| NSY | G/G      | 0 | 158 G/C    | 36  | 71  | TRUE | 1 R/R |
| NSY | G/G      | 0 | 115 G/C    | 43  | 116 | TRUE | 1 R/R |
| NSY | T/T      | 0 | 54 T/C     | 22  | 68  | TRUE | 1 R/R |
| NSY | C/C      | 0 | 26 C/A     | 13  | 22  | TRUE | 1 R/R |
| NSY | C/C      | 0 | 180 C/G    | 80  | 162 | TRUE | 1 R/R |
| NSY | G/G      | 1 | 95 G/A     | 28  | 77  | TRUE | 1 R/R |
| NSY | G/G      | 0 | 44 G/A     | 11  | 43  | TRUE | 1 R/R |
| NSY | G/G      | 0 | 118 G/C    | 43  | 65  | TRUE | 1 R/R |
| FS  | CCT/CCT  | 0 | 361 CCT/C  | 74  | 111 | TRUE | 1 R/R |
| NSY | G/G      | 0 | 183 G/A    | 67  | 104 | TRUE | 0 R/R |
| EE  | G/G      | 0 | 223 G/A    | 79  | 119 | TRUE | 1 R/R |
| NSY | A/A      | 2 | 30 A/C     | 6   | 20  | TRUE | 0 R/R |
| NSY | C/C      | 0 | 302 C/T    | 107 | 157 | TRUE | 1 R/R |
| NSY | C/C      | 0 | 21 C/G     | 7   | 15  | TRUE | 0 R/R |
| SS  | G/G      | 0 | 137 G/A    | 42  | 61  | TRUE | 1 R/R |
| FS  | GA/GA    | 0 | 137 GA/G   | 45  | 67  | TRUE | 1 R/R |
| NSY | G/G      | 0 | 71 G/A     | 13  | 46  | TRUE | 1 R/R |
| SG  | C/C      | 0 | 193 C/T    | 72  | 177 | TRUE | 1 R/R |
| SS  | C/C      | 2 | 21 C/CT    | 12  | 19  | TRUE | 0 R/R |
| NSY | C/C      | 0 | 89 C/T     | 34  | 67  | TRUE | 1 R/R |
| NSY | C/C      | 0 | 114 C/T    | 55  | 103 | TRUE | 1 R/R |
| NSY | C/C      | 0 | 130 C/G    | 50  | 110 | TRUE | 1 R/R |
| NSY | C/C      | 0 | 136 C/G    | 66  | 143 | TRUE | 1 R/R |
| NSY | G/G      | 0 | 21 G/T     | 9   | 27  | TRUE | 0 R/R |
| NSY | G/G      | 0 | 65 G/A     | 31  | 74  | TRUE | 1 R/R |
| NSY | G/G      | 0 | 41 G/A     | 11  | 31  | TRUE | 1 R/R |
| NSY | C/C      | 0 | 196 C/A    | 79  | 171 | TRUE | 1 R/R |
| NSY | G/G      | 0 | 361 G/C    | 124 | 340 | TRUE | 1 R/R |
| NSY | G/G      | 0 | 158 G/A    | 55  | 143 | TRUE | 1 R/R |
| SS  | C/C      | 0 | 44 C/G     | 26  | 56  | TRUE | 1 R/R |
| NSY | C/C      | 0 | 183 C/T    | 58  | 143 | TRUE | 1 R/R |
| NSY | C/C      | 0 | 41 C/G     | 23  | 62  | TRUE | 1 R/R |
| FS  | AATAG/AA | 0 | 49 AATAG/A | 20  | 56  | TRUE | 1 R/R |
| SG  | G/G      | 0 | 150 G/A    | 63  | 166 | TRUE | 1 R/R |
| SG  | C/C      | 0 | 229 C/T    | 74  | 205 | TRUE | 1 R/R |
| NSY | C/C      | 0 | 132 C/T    | 59  | 128 | TRUE | 1 R/R |
| NSY | G/G      | 0 | 135 G/A    | 67  | 125 | TRUE | 1 R/R |
| ESS | C/C      | 0 | 81 C/T     | 34  | 86  | TRUE | 1 R/R |
| NSY | G/G      | 0 | 252 G/C    | 86  | 254 | TRUE | 1 R/R |
| NSY | C/C      | 0 | 241 C/G    | 71  | 224 | TRUE | 1 R/R |
| SG  | C/C      | 0 | 101 C/A    | 38  | 95  | TRUE | 1 R/R |
| NSY | C/C      | 0 | 147 C/T    | 51  | 138 | TRUE | 1 R/R |
| NSY | C/C      | 1 | 190 C/T    | 57  | 147 | TRUE | 1 R/R |
| NSY | C/C      | 0 | 185 C/G    | 53  | 135 | TRUE | 1 R/R |
| NSY | C/C      | 0 | 102 C/G    | 36  | 90  | TRUE | 1 R/R |
| NSY | C/C      | 0 | 48 C/G     | 11  | 22  | TRUE | 1 R/R |
| NSY | G/G      | 0 | 231 G/A    | 56  | 152 | TRUE | 1 R/R |
| NSY | C/C      | 0 | 59 C/G     | 24  | 58  | TRUE | 1 R/R |
| NSY | C/C      | 0 | 102 C/T    | 30  | 62  | TRUE | 1 R/R |
| SG  | C/C      | 0 | 168 C/A    | 42  | 104 | TRUE | 1 R/R |
| SS  | G/G      | 0 | 76 G/C     | 31  | 76  | TRUE | 0 R/R |
| NSY | C/C      | 0 | 158 C/T    | 51  | 131 | TRUE | 1 R/R |

|     |       |   |         |     |     |      |       |
|-----|-------|---|---------|-----|-----|------|-------|
| NSY | G/G   | 0 | 220 G/A | 67  | 184 | TRUE | 1 R/R |
| NSY | C/C   | 0 | 72 C/G  | 24  | 48  | TRUE | 1 R/R |
| NSY | G/G   | 0 | 61 G/A  | 18  | 58  | TRUE | 1 R/R |
| NSY | T/T   | 1 | 29 T/G  | 3   | 39  | TRUE | 0 R/R |
| EE  | A/A   | 1 | 28 A/G  | 4   | 41  | TRUE | 0 R/R |
| SS  | C/C   | 1 | 26 C/G  | 4   | 38  | TRUE | 0 R/R |
| NSY | C/C   | 0 | 115 C/G | 40  | 106 | TRUE | 1 R/R |
| NSY | G/G   | 0 | 208 G/A | 92  | 204 | TRUE | 1 R/R |
| NSY | G/G   | 0 | 204 G/C | 69  | 223 | TRUE | 1 R/R |
| SG  | G/G   | 0 | 66 G/A  | 37  | 82  | TRUE | 1 R/R |
| NSY | C/C   | 0 | 217 C/G | 72  | 186 | TRUE | 1 R/R |
| NSY | C/C   | 0 | 48 C/T  | 12  | 44  | TRUE | 0 R/R |
| SS  | CT/CT | 1 | 29 CT/C | 6   | 35  | TRUE | 1 R/R |
| NSY | C/C   | 0 | 105 C/G | 37  | 81  | TRUE | 1 R/R |
| NSY | C/C   | 0 | 187 C/T | 57  | 152 | TRUE | 1 R/R |
| NSY | C/C   | 0 | 115 C/G | 46  | 110 | TRUE | 1 R/R |
| NSY | G/G   | 0 | 269 G/A | 79  | 200 | TRUE | 1 R/R |
| NSY | C/C   | 0 | 307 C/T | 75  | 211 | TRUE | 1 R/R |
| NSY | C/C   | 1 | 221 C/T | 74  | 170 | TRUE | 1 R/R |
| NSY | C/C   | 0 | 128 C/G | 26  | 83  | TRUE | 1 R/R |
| NSY | G/G   | 0 | 103 G/C | 25  | 76  | TRUE | 1 R/R |
| NSY | G/G   | 0 | 344 G/C | 107 | 289 | TRUE | 1 R/R |
| NSY | C/C   | 0 | 172 C/T | 61  | 144 | TRUE | 1 R/R |
| SG  | G/G   | 0 | 44 G/T  | 11  | 33  | TRUE | 0 R/R |
| NSY | G/G   | 0 | 115 G/A | 37  | 90  | TRUE | 1 R/R |
| NSY | C/C   | 0 | 195 C/T | 65  | 191 | TRUE | 1 R/R |
| NSY | C/C   | 0 | 40 C/G  | 14  | 37  | TRUE | 1 R/R |
| SG  | C/C   | 0 | 145 C/A | 50  | 119 | TRUE | 1 R/R |
| NSY | C/C   | 0 | 106 C/A | 44  | 104 | TRUE | 1 R/R |
| SG  | C/C   | 0 | 208 C/T | 33  | 166 | TRUE | 1 R/R |
| NSY | C/C   | 1 | 113 C/T | 24  | 81  | TRUE | 1 R/R |
| NSY | C/C   | 1 | 212 C/T | 93  | 196 | TRUE | 1 R/R |
| NSY | G/G   | 0 | 116 G/A | 29  | 77  | TRUE | 1 R/R |
| NSY | G/G   | 0 | 113 G/T | 33  | 95  | TRUE | 1 R/R |
| NSY | G/G   | 0 | 127 G/C | 58  | 138 | TRUE | 1 R/R |
| SG  | G/G   | 0 | 90 G/A  | 30  | 79  | TRUE | 1 R/R |
| NSY | G/G   | 0 | 69 G/A  | 36  | 81  | TRUE | 1 R/R |
| NSY | C/C   | 0 | 173 C/T | 57  | 158 | TRUE | 1 R/R |
| NSY | G/G   | 0 | 111 G/C | 44  | 115 | TRUE | 1 R/R |
| ESS | G/G   | 0 | 45 G/A  | 21  | 63  | TRUE | 0 R/R |
| NSY | G/G   | 0 | 206 G/A | 73  | 178 | TRUE | 1 R/R |
| NSY | C/C   | 0 | 192 C/T | 80  | 182 | TRUE | 1 R/R |
| NSY | G/G   | 0 | 157 G/A | 72  | 165 | TRUE | 1 R/R |
| NSY | G/G   | 0 | 94 G/A  | 45  | 106 | TRUE | 1 R/R |
| NSY | C/C   | 0 | 118 C/T | 43  | 118 | TRUE | 1 R/R |
| ESS | G/G   | 0 | 123 G/C | 30  | 87  | TRUE | 1 R/R |
| NSY | C/C   | 0 | 177 C/T | 62  | 103 | TRUE | 1 R/R |
| NSY | G/G   | 0 | 25 G/A  | 7   | 18  | TRUE | 1 R/R |
| NSY | A/A   | 1 | 81 A/G  | 4   | 43  | TRUE | 1 R/R |
| FS  | T/T   | 1 | 81 T/TC | 5   | 47  | TRUE | 1 R/R |
| NSY | C/C   | 0 | 219 C/T | 75  | 197 | TRUE | 1 R/R |
| NSY | T/T   | 0 | 136 T/A | 57  | 128 | TRUE | 1 R/R |
| NSY | G/G   | 0 | 86 G/A  | 38  | 90  | TRUE | 1 R/R |
| NSY | C/C   | 0 | 63 C/T  | 18  | 58  | TRUE | 1 R/R |
| SS  | G/G   | 0 | 39 G/A  | 26  | 47  | TRUE | 1 R/R |

|     |       |   |         |     |     |      |       |
|-----|-------|---|---------|-----|-----|------|-------|
| SG  | G/G   | 0 | 28 G/A  | 14  | 34  | TRUE | 0 R/R |
| NSY | G/G   | 0 | 65 G/C  | 35  | 82  | TRUE | 0 R/R |
| NSY | G/G   | 0 | 220 G/A | 56  | 78  | TRUE | 1 R/R |
| NSY | C/C   | 0 | 377 C/T | 129 | 206 | TRUE | 1 R/R |
| NSY | G/G   | 0 | 99 G/C  | 35  | 49  | TRUE | 1 R/R |
| NSY | G/G   | 0 | 73 G/T  | 9   | 53  | TRUE | 1 R/R |
| NSY | G/G   | 1 | 58 G/A  | 5   | 36  | TRUE | 1 R/R |
| NSY | G/G   | 1 | 41 G/A  | 5   | 37  | TRUE | 0 R/R |
| FS  | CT/CT | 1 | 40 CT/C | 5   | 37  | TRUE | 0 R/R |
| NSY | G/G   | 1 | 41 G/A  | 3   | 35  | TRUE | 0 R/R |
| SS  | G/G   | 0 | 55 G/C  | 15  | 19  | TRUE | 1 R/R |
| NSY | C/C   | 0 | 193 C/A | 56  | 86  | TRUE | 1 R/R |



| tumorClass | normHet  | tumorHet | covFilter | strandFilter | LOH   | SNVFilter | INDELFilter |
|------------|----------|----------|-----------|--------------|-------|-----------|-------------|
| R/A        | 0        | 0.732558 | TRUE      | TRUE         | FALSE | TRUE      | FALSE       |
| R/A        | 0        | 0.590909 | TRUE      | TRUE         | FALSE | TRUE      | FALSE       |
| R/A        | 0        | 0.703125 | TRUE      | TRUE         | FALSE | TRUE      | FALSE       |
| R/A        | 0        | 0.659794 | TRUE      | TRUE         | FALSE | TRUE      | FALSE       |
| R/A        | 0        | 0.75     | TRUE      | TRUE         | FALSE | TRUE      | FALSE       |
| R/A        | 0        | 0.64     | TRUE      | TRUE         | FALSE | TRUE      | FALSE       |
| R/A        | 0        | 0.641026 | TRUE      | TRUE         | FALSE | TRUE      | FALSE       |
| R/A        | 0        | 0.717391 | TRUE      | TRUE         | FALSE | TRUE      | FALSE       |
| R/A        | 0        | 0.582822 | TRUE      | TRUE         | FALSE | TRUE      | FALSE       |
| R/A        | 0        | 0.631579 | TRUE      | TRUE         | FALSE | TRUE      | FALSE       |
| R/A        | 0        | 0.7      | TRUE      | TRUE         | FALSE | TRUE      | FALSE       |
| R/A        | 0        | 0.763158 | TRUE      | TRUE         | FALSE | TRUE      | FALSE       |
| R/A        | 0        | 0.618421 | TRUE      | TRUE         | FALSE | TRUE      | FALSE       |
| R/A        | 0        | 0.736111 | TRUE      | TRUE         | FALSE | TRUE      | FALSE       |
| R/A        | 0.0625   | 0.125    | TRUE      | TRUE         | FALSE | TRUE      | FALSE       |
| R/A        | 0.043478 | 0.1875   | TRUE      | TRUE         | FALSE | TRUE      | FALSE       |
| R/A        | 0        | 0.245283 | TRUE      | TRUE         | FALSE | TRUE      | FALSE       |
| R/A        | 0.076923 | 0.375    | TRUE      | TRUE         | FALSE | TRUE      | FALSE       |
| R/A        | 0.08     | 0.289474 | TRUE      | TRUE         | FALSE | TRUE      | FALSE       |
| R/A        | 0        | 0.191489 | TRUE      | TRUE         | FALSE | TRUE      | FALSE       |
| R/A        | 0        | 0.239583 | TRUE      | TRUE         | FALSE | TRUE      | FALSE       |
| R/A        | 0        | 0.262548 | TRUE      | TRUE         | FALSE | TRUE      | FALSE       |
| R/A        | 0        | 0.207547 | TRUE      | TRUE         | FALSE | TRUE      | FALSE       |
| R/A        | 0        | 0.171141 | TRUE      | TRUE         | FALSE | TRUE      | FALSE       |
| R/A        | 0        | 0.147368 | TRUE      | TRUE         | FALSE | TRUE      | FALSE       |
| R/A        | 0        | 0.187135 | TRUE      | TRUE         | FALSE | TRUE      | FALSE       |
| R/A        | 0        | 0.160643 | TRUE      | TRUE         | FALSE | TRUE      | FALSE       |
| R/A        | 0        | 0.169054 | TRUE      | TRUE         | FALSE | TRUE      | FALSE       |
| R/A        | 0        | 0.222222 | TRUE      | TRUE         | FALSE | TRUE      | FALSE       |
| R/A        | 0        | 0.280303 | TRUE      | TRUE         | FALSE | TRUE      | FALSE       |
| R/A        | 0        | 0.245098 | TRUE      | TRUE         | FALSE | TRUE      | FALSE       |
| R/A        | 0        | 0.234568 | TRUE      | TRUE         | FALSE | TRUE      | FALSE       |
| R/A        | 0        | 0.239669 | TRUE      | TRUE         | FALSE | TRUE      | FALSE       |
| R/A        | 0        | 0.22     | TRUE      | TRUE         | FALSE | TRUE      | FALSE       |
| R/A        | 0        | 0.456395 | TRUE      | TRUE         | FALSE | TRUE      | FALSE       |
| R/A        | 0.006135 | 0.18107  | TRUE      | TRUE         | FALSE | TRUE      | FALSE       |
| R/A        | 0        | 0.276243 | TRUE      | TRUE         | FALSE | TRUE      | FALSE       |
| R/A        | 0        | 0.212121 | TRUE      | TRUE         | FALSE | TRUE      | FALSE       |
| R/A        | 0        | 0.244552 | TRUE      | TRUE         | FALSE | TRUE      | FALSE       |
| R/A        | 0        | 0.278689 | TRUE      | TRUE         | FALSE | TRUE      | FALSE       |
| R/A        | 0        | 0.189394 | TRUE      | TRUE         | FALSE | TRUE      | FALSE       |
| R/A        | 0        | 0.267606 | TRUE      | TRUE         | FALSE | TRUE      | FALSE       |
| R/A        | 0        | 0.373377 | TRUE      | TRUE         | FALSE | TRUE      | FALSE       |
| R/A        | 0        | 0.142857 | TRUE      | TRUE         | FALSE | TRUE      | FALSE       |
| R/A        | 0        | 0.424528 | TRUE      | TRUE         | FALSE | TRUE      | FALSE       |
| R/A        | 0        | 0.27451  | TRUE      | TRUE         | FALSE | TRUE      | FALSE       |
| R/A        | 0.047619 | 0.2      | TRUE      | TRUE         | FALSE | TRUE      | FALSE       |
| R/A        | 0        | 0.344595 | TRUE      | TRUE         | FALSE | TRUE      | FALSE       |
| R/A        | 0        | 0.343066 | TRUE      | TRUE         | FALSE | TRUE      | FALSE       |
| R/A        | 0        | 0.315789 | TRUE      | TRUE         | FALSE | TRUE      | FALSE       |
| R/A        | 0        | 0.5      | TRUE      | TRUE         | FALSE | TRUE      | FALSE       |
| R/A        | 0        | 0.395604 | TRUE      | TRUE         | FALSE | TRUE      | FALSE       |
| R/A        | 0        | 0.372093 | TRUE      | TRUE         | FALSE | TRUE      | FALSE       |
| R/A        | 0        | 0.445455 | TRUE      | TRUE         | FALSE | TRUE      | FALSE       |

|     |          |          |      |      |       |       |       |
|-----|----------|----------|------|------|-------|-------|-------|
| R/A | 0        | 0.365169 | TRUE | TRUE | FALSE | TRUE  | FALSE |
| R/A | 0        | 0.401961 | TRUE | TRUE | FALSE | TRUE  | FALSE |
| R/A | 0        | 0.470588 | TRUE | TRUE | FALSE | TRUE  | FALSE |
| R/A | 0        | 0.392308 | TRUE | TRUE | FALSE | TRUE  | FALSE |
| R/A | 0        | 0.40566  | TRUE | TRUE | FALSE | TRUE  | FALSE |
| R/A | 0        | 0.448    | TRUE | TRUE | FALSE | TRUE  | FALSE |
| R/A | 0        | 0.438776 | TRUE | TRUE | FALSE | TRUE  | FALSE |
| R/A | 0        | 0.412698 | TRUE | TRUE | FALSE | TRUE  | FALSE |
| R/A | 0.105263 | 0.473684 | TRUE | TRUE | FALSE | FALSE | TRUE  |
| R/A | 0.020619 | 0.136364 | TRUE | TRUE | FALSE | TRUE  | FALSE |
| R/A | 0        | 0.330882 | TRUE | TRUE | FALSE | TRUE  | FALSE |
| R/A | 0        | 0.453125 | TRUE | TRUE | FALSE | TRUE  | FALSE |
| R/A | 0        | 0.404255 | TRUE | TRUE | FALSE | TRUE  | FALSE |
| R/A | 0.032258 | 0.208333 | TRUE | TRUE | FALSE | FALSE | TRUE  |
| R/A | 0        | 0.390805 | TRUE | TRUE | FALSE | TRUE  | FALSE |
| R/A | 0        | 0.322222 | TRUE | TRUE | FALSE | TRUE  | FALSE |
| R/A | 0        | 0.267327 | TRUE | TRUE | FALSE | TRUE  | FALSE |
| R/A | 0        | 0.333333 | TRUE | TRUE | FALSE | TRUE  | FALSE |
| R/A | 0        | 0.343949 | TRUE | TRUE | FALSE | TRUE  | FALSE |
| R/A | 0        | 0.369369 | TRUE | TRUE | FALSE | TRUE  | FALSE |
| R/A | 0        | 0.439394 | TRUE | TRUE | FALSE | TRUE  | FALSE |
| R/A | 0        | 0.310345 | TRUE | TRUE | FALSE | TRUE  | FALSE |
| R/A | 0        | 0.366667 | TRUE | TRUE | FALSE | TRUE  | FALSE |
| R/A | 0.013158 | 0.393939 | TRUE | TRUE | FALSE | TRUE  | FALSE |
| R/A | 0        | 0.371134 | TRUE | TRUE | FALSE | TRUE  | FALSE |
| R/A | 0        | 0.377778 | TRUE | TRUE | FALSE | TRUE  | FALSE |
| R/A | 0        | 0.39801  | TRUE | TRUE | FALSE | TRUE  | FALSE |
| R/A | 0        | 0.387879 | TRUE | TRUE | FALSE | TRUE  | FALSE |
| R/A | 0        | 0.398551 | TRUE | TRUE | FALSE | TRUE  | FALSE |
| R/A | 0        | 0.324022 | TRUE | TRUE | FALSE | TRUE  | FALSE |
| R/A | 0        | 0.408163 | TRUE | TRUE | FALSE | TRUE  | FALSE |
| R/A | 0        | 0.385113 | TRUE | TRUE | FALSE | TRUE  | FALSE |
| R/A | 0        | 0.491071 | TRUE | TRUE | FALSE | TRUE  | FALSE |
| R/A | 0        | 0.414966 | TRUE | TRUE | FALSE | TRUE  | FALSE |
| R/A | 0        | 0.373832 | TRUE | TRUE | FALSE | TRUE  | FALSE |
| R/A | 0        | 0.388889 | TRUE | TRUE | FALSE | TRUE  | FALSE |
| R/A | 0        | 0.358696 | TRUE | TRUE | FALSE | TRUE  | FALSE |
| R/A | 0        | 0.346154 | TRUE | TRUE | FALSE | TRUE  | FALSE |
| R/A | 0        | 0.459259 | TRUE | TRUE | FALSE | TRUE  | FALSE |
| R/A | 0        | 0.3      | TRUE | TRUE | FALSE | TRUE  | FALSE |
| R/A | 0        | 0.476636 | TRUE | TRUE | FALSE | TRUE  | FALSE |
| R/A | 0        | 0.326087 | TRUE | TRUE | FALSE | TRUE  | FALSE |
| R/A | 0        | 0.309859 | TRUE | TRUE | FALSE | TRUE  | FALSE |
| R/A | 0        | 0.5      | TRUE | TRUE | FALSE | TRUE  | FALSE |
| R/A | 0        | 0.426829 | TRUE | TRUE | FALSE | TRUE  | FALSE |
| R/A | 0        | 0.301724 | TRUE | TRUE | FALSE | TRUE  | FALSE |
| R/A | 0        | 0.351351 | TRUE | TRUE | FALSE | TRUE  | FALSE |
| R/A | 0        | 0.4      | TRUE | TRUE | FALSE | TRUE  | FALSE |
| R/A | 0        | 0.386207 | TRUE | TRUE | FALSE | TRUE  | FALSE |
| R/A | 0        | 0.393617 | TRUE | TRUE | FALSE | TRUE  | FALSE |
| R/A | 0        | 0.333333 | TRUE | TRUE | FALSE | TRUE  | FALSE |
| R/A | 0        | 0.316667 | TRUE | TRUE | FALSE | TRUE  | FALSE |
| R/A | 0        | 0.286458 | TRUE | TRUE | FALSE | TRUE  | FALSE |
| R/A | 0        | 0.368421 | TRUE | TRUE | FALSE | TRUE  | FALSE |
| R/A | 0        | 0.547619 | TRUE | TRUE | FALSE | TRUE  | FALSE |

|     |          |          |      |      |       |       |       |
|-----|----------|----------|------|------|-------|-------|-------|
| R/A | 0.034483 | 0.217391 | TRUE | TRUE | FALSE | FALSE | TRUE  |
| R/A | 0        | 0.574713 | TRUE | TRUE | FALSE | TRUE  | FALSE |
| R/A | 0        | 0.468085 | TRUE | TRUE | FALSE | TRUE  | FALSE |
| R/A | 0        | 0.296296 | TRUE | TRUE | FALSE | TRUE  | FALSE |
| R/A | 0        | 0.34     | TRUE | TRUE | FALSE | TRUE  | FALSE |
| R/A | 0        | 0.460432 | TRUE | TRUE | FALSE | TRUE  | FALSE |
| R/A | 0        | 0.333333 | TRUE | TRUE | FALSE | TRUE  | FALSE |
| R/A | 0        | 0.52459  | TRUE | TRUE | FALSE | TRUE  | FALSE |
| R/A | 0.010417 | 0.369863 | TRUE | TRUE | FALSE | TRUE  | FALSE |
| R/A | 0        | 0.351351 | TRUE | TRUE | FALSE | TRUE  | FALSE |
| R/A | 0        | 0.307116 | TRUE | TRUE | FALSE | TRUE  | FALSE |
| R/A | 0        | 0.305263 | TRUE | TRUE | FALSE | TRUE  | FALSE |
| R/A | 0.026316 | 0.090909 | TRUE | TRUE | FALSE | TRUE  | FALSE |
| R/A | 0.027027 | 0.095238 | TRUE | TRUE | FALSE | TRUE  | FALSE |
| R/A | 0        | 0.4      | TRUE | TRUE | FALSE | TRUE  | FALSE |
| R/A | 0        | 0.45098  | TRUE | TRUE | FALSE | TRUE  | FALSE |
| R/A | 0        | 0.353659 | TRUE | TRUE | FALSE | TRUE  | FALSE |
| R/A | 0        | 0.403727 | TRUE | TRUE | FALSE | TRUE  | FALSE |
| R/A | 0        | 0.432    | TRUE | TRUE | FALSE | TRUE  | FALSE |
| R/A | 0        | 0.454545 | TRUE | TRUE | FALSE | TRUE  | FALSE |
| R/A | 0        | 0.382022 | TRUE | TRUE | FALSE | TRUE  | FALSE |
| R/A | 0        | 0.436364 | TRUE | TRUE | FALSE | TRUE  | FALSE |
| R/A | 0        | 0.47561  | TRUE | TRUE | FALSE | TRUE  | FALSE |
| R/A | 0        | 0.352113 | TRUE | TRUE | FALSE | TRUE  | FALSE |
| R/A | 0        | 0.341317 | TRUE | TRUE | FALSE | TRUE  | FALSE |
| R/A | 0        | 0.354839 | TRUE | TRUE | FALSE | TRUE  | FALSE |
| R/A | 0        | 0.285714 | TRUE | TRUE | FALSE | TRUE  | FALSE |
| R/A | 0        | 0.439024 | TRUE | TRUE | FALSE | TRUE  | FALSE |
| R/A | 0.01626  | 0.081395 | TRUE | TRUE | FALSE | TRUE  | FALSE |
| R/A | 0.016129 | 0.085366 | TRUE | TRUE | FALSE | TRUE  | FALSE |
| R/A | 0        | 0.387097 | TRUE | TRUE | FALSE | TRUE  | FALSE |
| R/A | 0        | 0.350649 | TRUE | TRUE | FALSE | TRUE  | FALSE |
| R/A | 0        | 0.356322 | TRUE | TRUE | FALSE | TRUE  | FALSE |
| R/A | 0        | 0.421687 | TRUE | TRUE | FALSE | TRUE  | FALSE |
| R/A | 0.025641 | 0.16     | TRUE | TRUE | FALSE | FALSE | TRUE  |
| R/A | 0.025641 | 0.086957 | TRUE | TRUE | FALSE | TRUE  | FALSE |
| R/A | 0.045455 | 0.176471 | TRUE | TRUE | FALSE | TRUE  | FALSE |
| R/A | 0.05     | 0.1875   | TRUE | TRUE | FALSE | TRUE  | FALSE |
| R/A | 0.025    | 0.1      | TRUE | TRUE | FALSE | TRUE  | FALSE |
| R/A | 0.006452 | 0.444444 | TRUE | TRUE | FALSE | TRUE  | FALSE |
| R/A | 0.027027 | 0.337662 | TRUE | TRUE | FALSE | TRUE  | FALSE |
| R/A | 0        | 0.413333 | TRUE | TRUE | FALSE | TRUE  | FALSE |
| R/A | 0        | 0.207792 | TRUE | TRUE | FALSE | TRUE  | FALSE |
| R/A | 0        | 0.382353 | TRUE | TRUE | FALSE | TRUE  | FALSE |
| R/A | 0.005495 | 0.305732 | TRUE | TRUE | FALSE | TRUE  | FALSE |
| R/A | 0        | 0.482456 | TRUE | TRUE | FALSE | TRUE  | FALSE |
| R/A | 0        | 0.402685 | TRUE | TRUE | FALSE | TRUE  | FALSE |
| R/A | 0        | 0.352941 | TRUE | TRUE | FALSE | TRUE  | FALSE |
| R/A | 0        | 0.3125   | TRUE | TRUE | FALSE | TRUE  | FALSE |
| R/A | 0        | 0.380282 | TRUE | TRUE | FALSE | TRUE  | FALSE |
| R/A | 0        | 0.45     | TRUE | TRUE | FALSE | TRUE  | FALSE |
| R/A | 0        | 0.376712 | TRUE | TRUE | FALSE | TRUE  | FALSE |
| R/A | 0        | 0.372881 | TRUE | TRUE | FALSE | TRUE  | FALSE |
| R/A | 0        | 0.385417 | TRUE | TRUE | FALSE | TRUE  | FALSE |
| R/A | 0        | 0.169065 | TRUE | TRUE | FALSE | TRUE  | FALSE |

|     |          |          |      |      |       |       |       |
|-----|----------|----------|------|------|-------|-------|-------|
| R/A | 0        | 0.269231 | TRUE | TRUE | FALSE | TRUE  | FALSE |
| R/A | 0        | 0.369863 | TRUE | TRUE | FALSE | TRUE  | FALSE |
| R/A | 0        | 0.378571 | TRUE | TRUE | FALSE | TRUE  | FALSE |
| R/A | 0.074074 | 0.25641  | TRUE | TRUE | FALSE | FALSE | TRUE  |
| R/A | 0.066667 | 0.107143 | TRUE | TRUE | FALSE | TRUE  | FALSE |
| R/A | 0.058824 | 0.115385 | TRUE | TRUE | FALSE | TRUE  | FALSE |
| R/A | 0.051282 | 0.177778 | TRUE | TRUE | FALSE | TRUE  | FALSE |
| R/A | 0        | 0.408072 | TRUE | TRUE | FALSE | TRUE  | FALSE |
| R/A | 0        | 0.4      | TRUE | TRUE | FALSE | TRUE  | FALSE |
| R/A | 0        | 0.372549 | TRUE | TRUE | FALSE | TRUE  | FALSE |
| R/A | 0        | 0.398649 | TRUE | TRUE | FALSE | TRUE  | FALSE |
| R/A | 0        | 0.376068 | TRUE | TRUE | FALSE | TRUE  | FALSE |
| R/A | 0        | 0.342105 | TRUE | TRUE | FALSE | TRUE  | FALSE |
| R/A | 0        | 0.371622 | TRUE | TRUE | FALSE | TRUE  | FALSE |
| R/A | 0        | 0.398438 | TRUE | TRUE | FALSE | TRUE  | FALSE |
| R/A | 0        | 0.339286 | TRUE | TRUE | FALSE | TRUE  | FALSE |
| R/A | 0        | 0.375758 | TRUE | TRUE | FALSE | TRUE  | FALSE |
| R/A | 0        | 0.431579 | TRUE | TRUE | FALSE | TRUE  | FALSE |
| R/A | 0        | 0.309091 | TRUE | TRUE | FALSE | TRUE  | FALSE |
| R/A | 0        | 0.411765 | TRUE | TRUE | FALSE | TRUE  | FALSE |
| R/A | 0        | 0.427807 | TRUE | TRUE | FALSE | TRUE  | FALSE |
| R/A | 0        | 0.355556 | TRUE | TRUE | FALSE | TRUE  | FALSE |
| R/A | 0        | 0.346591 | TRUE | TRUE | FALSE | TRUE  | FALSE |
| R/A | 0        | 0.375796 | TRUE | TRUE | FALSE | TRUE  | FALSE |
| R/A | 0        | 0.362069 | TRUE | TRUE | FALSE | TRUE  | FALSE |
| R/A | 0        | 0.362319 | TRUE | TRUE | FALSE | TRUE  | FALSE |
| R/A | 0        | 0.129032 | TRUE | TRUE | FALSE | FALSE | TRUE  |
| R/A | 0        | 0.269841 | TRUE | TRUE | FALSE | TRUE  | FALSE |
| R/A | 0        | 0.310811 | TRUE | TRUE | FALSE | TRUE  | FALSE |
| R/A | 0        | 0.358974 | TRUE | TRUE | FALSE | TRUE  | FALSE |
| R/A | 0        | 0.46     | TRUE | TRUE | FALSE | TRUE  | FALSE |
| R/A | 0.058824 | 0.368421 | TRUE | TRUE | FALSE | TRUE  | FALSE |
| R/A | 0        | 0.290323 | TRUE | TRUE | FALSE | TRUE  | FALSE |
| R/A | 0.047619 | 0.1875   | TRUE | TRUE | FALSE | TRUE  | FALSE |
| R/A | 0        | 0.409524 | TRUE | TRUE | FALSE | TRUE  | FALSE |
| R/A | 0        | 0.408163 | TRUE | TRUE | FALSE | TRUE  | FALSE |
| R/A | 0        | 0.330579 | TRUE | TRUE | FALSE | TRUE  | FALSE |
| R/A | 0        | 0.368421 | TRUE | TRUE | FALSE | TRUE  | FALSE |
| R/A | 0.083333 | 0.2      | TRUE | TRUE | FALSE | FALSE | TRUE  |
| R/A | 0        | 0.26087  | TRUE | TRUE | FALSE | TRUE  | FALSE |
| R/A | 0.005556 | 0.339394 | TRUE | TRUE | FALSE | TRUE  | FALSE |
| R/A | 0        | 0.4      | TRUE | TRUE | FALSE | TRUE  | FALSE |
| R/A | 0        | 0.381443 | TRUE | TRUE | FALSE | TRUE  | FALSE |
| R/A | 0        | 0.445122 | TRUE | TRUE | FALSE | TRUE  | FALSE |
| R/A | 0        | 0.444444 | TRUE | TRUE | FALSE | TRUE  | FALSE |
| R/A | 0        | 0.458333 | TRUE | TRUE | FALSE | TRUE  | FALSE |
| R/A | 0        | 0.346154 | TRUE | TRUE | FALSE | TRUE  | FALSE |
| R/A | 0        | 0.343558 | TRUE | TRUE | FALSE | TRUE  | FALSE |
| R/A | 0        | 0.383333 | TRUE | TRUE | FALSE | TRUE  | FALSE |
| R/A | 0        | 0.35     | TRUE | TRUE | FALSE | TRUE  | FALSE |
| R/A | 0        | 0.369048 | TRUE | TRUE | FALSE | TRUE  | FALSE |
| R/A | 0        | 0.349206 | TRUE | TRUE | FALSE | TRUE  | FALSE |
| R/A | 0        | 0.310345 | TRUE | TRUE | FALSE | TRUE  | FALSE |
| R/A | 0        | 0.375    | TRUE | TRUE | FALSE | TRUE  | FALSE |
| R/A | 0        | 0.433735 | TRUE | TRUE | FALSE | TRUE  | FALSE |

|     |          |          |      |      |       |       |       |
|-----|----------|----------|------|------|-------|-------|-------|
| R/A | 0        | 0.413793 | TRUE | TRUE | FALSE | TRUE  | FALSE |
| R/A | 0        | 0.337017 | TRUE | TRUE | FALSE | TRUE  | FALSE |
| R/A | 0        | 0.444444 | TRUE | TRUE | FALSE | TRUE  | FALSE |
| R/A | 0        | 0.346154 | TRUE | TRUE | FALSE | TRUE  | FALSE |
| R/A | 0        | 0.412281 | TRUE | TRUE | FALSE | TRUE  | FALSE |
| R/A | 0        | 0.414063 | TRUE | TRUE | FALSE | TRUE  | FALSE |
| R/A | 0        | 0.351485 | TRUE | TRUE | FALSE | TRUE  | FALSE |
| R/A | 0        | 0.44     | TRUE | TRUE | FALSE | TRUE  | FALSE |
| R/A | 0        | 0.448276 | TRUE | TRUE | FALSE | TRUE  | FALSE |
| R/A | 0        | 0.404762 | TRUE | TRUE | FALSE | TRUE  | FALSE |
| R/A | 0        | 0.34127  | TRUE | TRUE | FALSE | TRUE  | FALSE |
| R/A | 0        | 0.365079 | TRUE | TRUE | FALSE | TRUE  | FALSE |
| R/A | 0        | 0.5      | TRUE | TRUE | FALSE | TRUE  | FALSE |
| R/A | 0        | 0.383117 | TRUE | TRUE | FALSE | TRUE  | FALSE |
| R/A | 0.016529 | 0.401575 | TRUE | TRUE | FALSE | TRUE  | FALSE |
| R/A | 0        | 0.405063 | TRUE | TRUE | FALSE | TRUE  | FALSE |
| R/A | 0        | 0.45082  | TRUE | TRUE | FALSE | TRUE  | FALSE |
| R/A | 0        | 0.368966 | TRUE | TRUE | FALSE | TRUE  | FALSE |
| R/A | 0        | 0.170213 | TRUE | TRUE | FALSE | TRUE  | FALSE |
| R/A | 0        | 0.166667 | TRUE | TRUE | FALSE | TRUE  | FALSE |
| R/A | 0        | 0.147059 | TRUE | TRUE | FALSE | TRUE  | FALSE |
| R/A | 0        | 0.142857 | TRUE | TRUE | FALSE | FALSE | TRUE  |
| R/A | 0        | 0.16     | TRUE | TRUE | FALSE | TRUE  | FALSE |
| R/A | 0        | 0.166667 | TRUE | TRUE | FALSE | TRUE  | FALSE |
| R/A | 0        | 0.441176 | TRUE | TRUE | FALSE | TRUE  | FALSE |
| R/A | 0        | 0.361111 | TRUE | TRUE | FALSE | TRUE  | FALSE |
| R/A | 0        | 0.269504 | TRUE | TRUE | FALSE | TRUE  | FALSE |
| R/A | 0        | 0.2      | TRUE | TRUE | FALSE | TRUE  | FALSE |
| R/A | 0        | 0.351648 | TRUE | TRUE | FALSE | TRUE  | FALSE |
| R/A | 0        | 0.428571 | TRUE | TRUE | FALSE | TRUE  | FALSE |
| R/A | 0.021739 | 0.315068 | TRUE | TRUE | FALSE | TRUE  | FALSE |
| R/A | 0        | 0.327869 | TRUE | TRUE | FALSE | TRUE  | FALSE |
| R/A | 0.027778 | 0.214286 | TRUE | TRUE | FALSE | TRUE  | FALSE |
| R/A | 0.052632 | 0.241379 | TRUE | TRUE | FALSE | TRUE  | FALSE |
| R/A | 0        | 0.259259 | TRUE | TRUE | FALSE | TRUE  | FALSE |
| R/A | 0        | 0.446809 | TRUE | TRUE | FALSE | TRUE  | FALSE |
| R/A | 0        | 0.360294 | TRUE | TRUE | FALSE | TRUE  | FALSE |
| R/A | 0        | 0.247934 | TRUE | TRUE | FALSE | TRUE  | FALSE |
| R/A | 0        | 0.392857 | TRUE | TRUE | FALSE | TRUE  | FALSE |
| R/A | 0        | 0.78125  | TRUE | TRUE | FALSE | TRUE  | FALSE |
| R/A | 0        | 0.781818 | TRUE | TRUE | FALSE | TRUE  | FALSE |
| R/A | 0        | 0.578947 | TRUE | TRUE | FALSE | TRUE  | FALSE |
| R/A | 0        | 0.647059 | TRUE | TRUE | FALSE | TRUE  | FALSE |
| R/A | 0        | 0.415842 | TRUE | TRUE | FALSE | TRUE  | FALSE |
| R/A | 0        | 0.378882 | TRUE | TRUE | FALSE | TRUE  | FALSE |
| R/A | 0        | 0.304348 | TRUE | TRUE | FALSE | TRUE  | FALSE |
| R/A | 0        | 0.30303  | TRUE | TRUE | FALSE | TRUE  | FALSE |
| R/A | 0        | 0.354839 | TRUE | TRUE | FALSE | TRUE  | FALSE |
| R/A | 0        | 0.413534 | TRUE | TRUE | FALSE | TRUE  | FALSE |
| R/A | 0        | 0.391089 | TRUE | TRUE | FALSE | TRUE  | FALSE |
| R/A | 0        | 0.3125   | TRUE | TRUE | FALSE | TRUE  | FALSE |
| R/A | 0        | 0.466667 | TRUE | TRUE | FALSE | TRUE  | FALSE |
| R/A | 0        | 0.701493 | TRUE | TRUE | FALSE | TRUE  | FALSE |
| R/A | 0        | 0.703125 | TRUE | TRUE | FALSE | TRUE  | FALSE |
| R/A | 0        | 0.74359  | TRUE | TRUE | FALSE | TRUE  | FALSE |

|     |          |          |      |      |       |       |       |
|-----|----------|----------|------|------|-------|-------|-------|
| R/A | 0        | 0.84375  | TRUE | TRUE | FALSE | TRUE  | FALSE |
| R/A | 0        | 0.791946 | TRUE | TRUE | FALSE | TRUE  | FALSE |
| R/A | 0        | 0.62963  | TRUE | TRUE | FALSE | TRUE  | FALSE |
| R/A | 0        | 0.507042 | TRUE | TRUE | FALSE | TRUE  | FALSE |
| R/A | 0        | 0.37069  | TRUE | TRUE | FALSE | TRUE  | FALSE |
| R/A | 0        | 0.323529 | TRUE | TRUE | FALSE | TRUE  | FALSE |
| R/A | 0        | 0.590909 | TRUE | TRUE | FALSE | TRUE  | FALSE |
| R/A | 0        | 0.493827 | TRUE | TRUE | FALSE | TRUE  | FALSE |
| R/A | 0.010526 | 0.363636 | TRUE | TRUE | FALSE | TRUE  | FALSE |
| R/A | 0        | 0.255814 | TRUE | TRUE | FALSE | TRUE  | FALSE |
| R/A | 0        | 0.661538 | TRUE | TRUE | FALSE | TRUE  | FALSE |
| R/A | 0        | 0.666667 | TRUE | TRUE | FALSE | FALSE | TRUE  |
| R/A | 0        | 0.644231 | TRUE | TRUE | FALSE | TRUE  | FALSE |
| R/A | 0        | 0.663866 | TRUE | TRUE | FALSE | TRUE  | FALSE |
| R/A | 0.066667 | 0.3      | TRUE | TRUE | FALSE | TRUE  | FALSE |
| R/A | 0        | 0.681529 | TRUE | TRUE | FALSE | TRUE  | FALSE |
| R/A | 0        | 0.466667 | TRUE | TRUE | FALSE | TRUE  | FALSE |
| R/A | 0        | 0.688525 | TRUE | TRUE | FALSE | TRUE  | FALSE |
| R/A | 0        | 0.671642 | TRUE | TRUE | FALSE | FALSE | TRUE  |
| R/A | 0        | 0.282609 | TRUE | TRUE | FALSE | TRUE  | FALSE |
| R/A | 0        | 0.40678  | TRUE | TRUE | FALSE | TRUE  | FALSE |
| R/A | 0.095238 | 0.631579 | TRUE | TRUE | FALSE | FALSE | TRUE  |
| R/A | 0        | 0.507463 | TRUE | TRUE | FALSE | TRUE  | FALSE |
| R/A | 0        | 0.533981 | TRUE | TRUE | FALSE | TRUE  | FALSE |
| R/A | 0        | 0.454545 | TRUE | TRUE | FALSE | TRUE  | FALSE |
| R/A | 0        | 0.461538 | TRUE | TRUE | FALSE | TRUE  | FALSE |
| R/A | 0        | 0.333333 | TRUE | TRUE | FALSE | TRUE  | FALSE |
| R/A | 0        | 0.418919 | TRUE | TRUE | FALSE | TRUE  | FALSE |
| R/A | 0        | 0.354839 | TRUE | TRUE | FALSE | TRUE  | FALSE |
| R/A | 0        | 0.461988 | TRUE | TRUE | FALSE | TRUE  | FALSE |
| R/A | 0        | 0.364706 | TRUE | TRUE | FALSE | TRUE  | FALSE |
| R/A | 0        | 0.384615 | TRUE | TRUE | FALSE | TRUE  | FALSE |
| R/A | 0        | 0.464286 | TRUE | TRUE | FALSE | TRUE  | FALSE |
| R/A | 0        | 0.405594 | TRUE | TRUE | FALSE | TRUE  | FALSE |
| R/A | 0        | 0.370968 | TRUE | TRUE | FALSE | TRUE  | FALSE |
| R/A | 0        | 0.357143 | TRUE | TRUE | FALSE | FALSE | TRUE  |
| R/A | 0        | 0.379518 | TRUE | TRUE | FALSE | TRUE  | FALSE |
| R/A | 0        | 0.360976 | TRUE | TRUE | FALSE | TRUE  | FALSE |
| R/A | 0        | 0.460938 | TRUE | TRUE | FALSE | TRUE  | FALSE |
| R/A | 0        | 0.536    | TRUE | TRUE | FALSE | TRUE  | FALSE |
| R/A | 0        | 0.395349 | TRUE | TRUE | FALSE | TRUE  | FALSE |
| R/A | 0        | 0.338583 | TRUE | TRUE | FALSE | TRUE  | FALSE |
| R/A | 0        | 0.316964 | TRUE | TRUE | FALSE | TRUE  | FALSE |
| R/A | 0        | 0.4      | TRUE | TRUE | FALSE | TRUE  | FALSE |
| R/A | 0        | 0.369565 | TRUE | TRUE | FALSE | TRUE  | FALSE |
| R/A | 0.005263 | 0.387755 | TRUE | TRUE | FALSE | TRUE  | FALSE |
| R/A | 0        | 0.392593 | TRUE | TRUE | FALSE | TRUE  | FALSE |
| R/A | 0        | 0.4      | TRUE | TRUE | FALSE | TRUE  | FALSE |
| R/A | 0        | 0.5      | TRUE | TRUE | FALSE | TRUE  | FALSE |
| R/A | 0        | 0.368421 | TRUE | TRUE | FALSE | TRUE  | FALSE |
| R/A | 0        | 0.413793 | TRUE | TRUE | FALSE | TRUE  | FALSE |
| R/A | 0        | 0.483871 | TRUE | TRUE | FALSE | TRUE  | FALSE |
| R/A | 0        | 0.403846 | TRUE | TRUE | FALSE | TRUE  | FALSE |
| R/A | 0        | 0.407895 | TRUE | TRUE | FALSE | TRUE  | FALSE |
| R/A | 0        | 0.389313 | TRUE | TRUE | FALSE | TRUE  | FALSE |

|     |          |          |      |      |       |       |       |
|-----|----------|----------|------|------|-------|-------|-------|
| R/A | 0        | 0.36413  | TRUE | TRUE | FALSE | TRUE  | FALSE |
| R/A | 0        | 0.5      | TRUE | TRUE | FALSE | TRUE  | FALSE |
| R/A | 0        | 0.310345 | TRUE | TRUE | FALSE | TRUE  | FALSE |
| R/A | 0.034483 | 0.076923 | TRUE | TRUE | FALSE | TRUE  | FALSE |
| R/A | 0.035714 | 0.097561 | TRUE | TRUE | FALSE | TRUE  | FALSE |
| R/A | 0.038462 | 0.105263 | TRUE | TRUE | FALSE | TRUE  | FALSE |
| R/A | 0        | 0.377358 | TRUE | TRUE | FALSE | TRUE  | FALSE |
| R/A | 0        | 0.45098  | TRUE | TRUE | FALSE | TRUE  | FALSE |
| R/A | 0        | 0.309417 | TRUE | TRUE | FALSE | TRUE  | FALSE |
| R/A | 0        | 0.45122  | TRUE | TRUE | FALSE | TRUE  | FALSE |
| R/A | 0        | 0.387097 | TRUE | TRUE | FALSE | TRUE  | FALSE |
| R/A | 0        | 0.272727 | TRUE | TRUE | FALSE | TRUE  | FALSE |
| R/A | 0.034483 | 0.171429 | TRUE | TRUE | FALSE | FALSE | TRUE  |
| R/A | 0        | 0.45679  | TRUE | TRUE | FALSE | TRUE  | FALSE |
| R/A | 0        | 0.375    | TRUE | TRUE | FALSE | TRUE  | FALSE |
| R/A | 0        | 0.418182 | TRUE | TRUE | FALSE | TRUE  | FALSE |
| R/A | 0        | 0.395    | TRUE | TRUE | FALSE | TRUE  | FALSE |
| R/A | 0        | 0.35545  | TRUE | TRUE | FALSE | TRUE  | FALSE |
| R/A | 0.004525 | 0.435294 | TRUE | TRUE | FALSE | TRUE  | FALSE |
| R/A | 0        | 0.313253 | TRUE | TRUE | FALSE | TRUE  | FALSE |
| R/A | 0        | 0.328947 | TRUE | TRUE | FALSE | TRUE  | FALSE |
| R/A | 0        | 0.370242 | TRUE | TRUE | FALSE | TRUE  | FALSE |
| R/A | 0        | 0.423611 | TRUE | TRUE | FALSE | TRUE  | FALSE |
| R/A | 0        | 0.333333 | TRUE | TRUE | FALSE | TRUE  | FALSE |
| R/A | 0        | 0.411111 | TRUE | TRUE | FALSE | TRUE  | FALSE |
| R/A | 0        | 0.340314 | TRUE | TRUE | FALSE | TRUE  | FALSE |
| R/A | 0        | 0.378378 | TRUE | TRUE | FALSE | TRUE  | FALSE |
| R/A | 0        | 0.420168 | TRUE | TRUE | FALSE | TRUE  | FALSE |
| R/A | 0        | 0.423077 | TRUE | TRUE | FALSE | TRUE  | FALSE |
| R/A | 0        | 0.198795 | TRUE | TRUE | FALSE | TRUE  | FALSE |
| R/A | 0.00885  | 0.296296 | TRUE | TRUE | FALSE | TRUE  | FALSE |
| R/A | 0.004717 | 0.47449  | TRUE | TRUE | FALSE | TRUE  | FALSE |
| R/A | 0        | 0.376623 | TRUE | TRUE | FALSE | TRUE  | FALSE |
| R/A | 0        | 0.347368 | TRUE | TRUE | FALSE | TRUE  | FALSE |
| R/A | 0        | 0.42029  | TRUE | TRUE | FALSE | TRUE  | FALSE |
| R/A | 0        | 0.379747 | TRUE | TRUE | FALSE | TRUE  | FALSE |
| R/A | 0        | 0.444444 | TRUE | TRUE | FALSE | TRUE  | FALSE |
| R/A | 0        | 0.360759 | TRUE | TRUE | FALSE | TRUE  | FALSE |
| R/A | 0        | 0.382609 | TRUE | TRUE | FALSE | TRUE  | FALSE |
| R/A | 0        | 0.333333 | TRUE | TRUE | FALSE | TRUE  | FALSE |
| R/A | 0        | 0.410112 | TRUE | TRUE | FALSE | TRUE  | FALSE |
| R/A | 0        | 0.43956  | TRUE | TRUE | FALSE | TRUE  | FALSE |
| R/A | 0        | 0.436364 | TRUE | TRUE | FALSE | TRUE  | FALSE |
| R/A | 0        | 0.424528 | TRUE | TRUE | FALSE | TRUE  | FALSE |
| R/A | 0        | 0.364407 | TRUE | TRUE | FALSE | TRUE  | FALSE |
| R/A | 0        | 0.344828 | TRUE | TRUE | FALSE | TRUE  | FALSE |
| R/A | 0        | 0.601942 | TRUE | TRUE | FALSE | TRUE  | FALSE |
| R/A | 0        | 0.388889 | TRUE | TRUE | FALSE | TRUE  | FALSE |
| R/A | 0.012346 | 0.093023 | TRUE | TRUE | FALSE | TRUE  | FALSE |
| R/A | 0.012346 | 0.106383 | TRUE | TRUE | FALSE | FALSE | TRUE  |
| R/A | 0        | 0.380711 | TRUE | TRUE | FALSE | TRUE  | FALSE |
| R/A | 0        | 0.445313 | TRUE | TRUE | FALSE | TRUE  | FALSE |
| R/A | 0        | 0.422222 | TRUE | TRUE | FALSE | TRUE  | FALSE |
| R/A | 0        | 0.310345 | TRUE | TRUE | FALSE | TRUE  | FALSE |
| R/A | 0        | 0.553191 | TRUE | TRUE | FALSE | TRUE  | FALSE |

|     |          |          |      |      |       |       |       |
|-----|----------|----------|------|------|-------|-------|-------|
| R/A | 0        | 0.411765 | TRUE | TRUE | FALSE | TRUE  | FALSE |
| R/A | 0        | 0.426829 | TRUE | TRUE | FALSE | TRUE  | FALSE |
| R/A | 0        | 0.717949 | TRUE | TRUE | FALSE | TRUE  | FALSE |
| R/A | 0        | 0.626214 | TRUE | TRUE | FALSE | TRUE  | FALSE |
| R/A | 0        | 0.714286 | TRUE | TRUE | FALSE | TRUE  | FALSE |
| R/A | 0        | 0.169811 | TRUE | TRUE | FALSE | TRUE  | FALSE |
| R/A | 0.017241 | 0.138889 | TRUE | TRUE | FALSE | TRUE  | FALSE |
| R/A | 0.02439  | 0.135135 | TRUE | TRUE | FALSE | TRUE  | FALSE |
| R/A | 0.025    | 0.135135 | TRUE | TRUE | FALSE | FALSE | TRUE  |
| R/A | 0.02439  | 0.085714 | TRUE | TRUE | FALSE | TRUE  | FALSE |
| R/A | 0        | 0.789474 | TRUE | TRUE | FALSE | TRUE  | FALSE |
| R/A | 0        | 0.651163 | TRUE | TRUE | FALSE | TRUE  | FALSE |
